# Supplementary material
Source: PubMed Central journal article supplement (PMC5601343)
Supplement: AEM.00888-17_zam999118070s1.pdf [file AEM.00888-17_zam999118070s1.pdf]

## Supplementary Figures

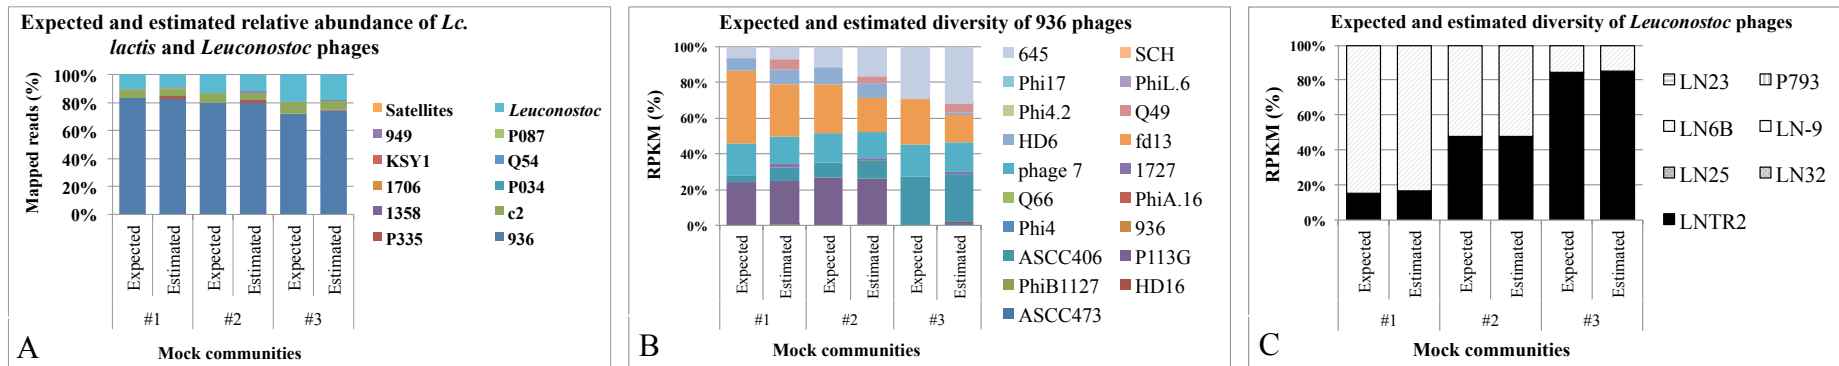

**Fig. S1.** Setting up of parameters for analysis of dairy metaviromes based on synthetic mock communities. The mock communities were intended to have a mixture of one million reads sampled from the genomes of *Lc. Lactis* and *Leuconostoc* phages. The actual or ‘Expected’ distribution of sequences is shown for comparison. (A) Relative abundance estimation of different *Lc. lactis* and *Leuconostoc* phages through mapping to corresponding reference genomes using 50% minimum query length and 80% minimum similarity thresholds. The result is expressed as the ‘Estimated’ percentage of mapped reads. (B) Estimation of the diversity of 936 phages through mapping to 936 phages receptor binding protein (RBP) sequences using 95% minimum query length and similarity thresholds. The result is expressed as reads per kilobase per million reads (RPKM) - the number of mapped reads normalized by the size of the subject RBP sequence. (C) Estimation of the diversity of *Leuconostoc* phages through mapping to *Leuconostoc* phages RBPs (the same threshold as for B).

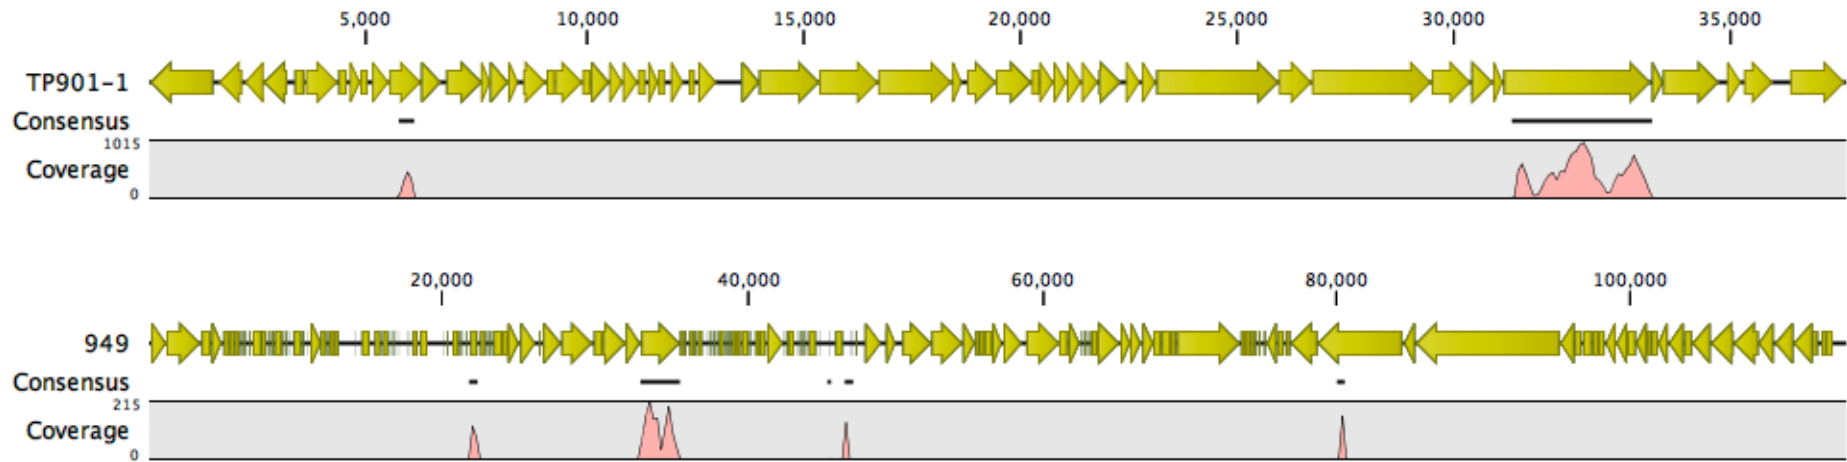

**Fig. S2.** Non-specific mapping of 936 phage sequences to TP901-1 and 949 genomes. A 50% minimum query length and 80% minimum identity thresholds were used for mapping mock communities to reference genomes. X- and Y-axis represent the reference genomes and the coverages, respectively. The regions with read coverage on the TP901-1 genome correspond to *orf11* (left) and *nps* (right), and on the 949 genome to *gp047*, *gp062*, *gt004*, *gt005* (including the upstream intergenic space) and *gp128* (left to right, respectively).

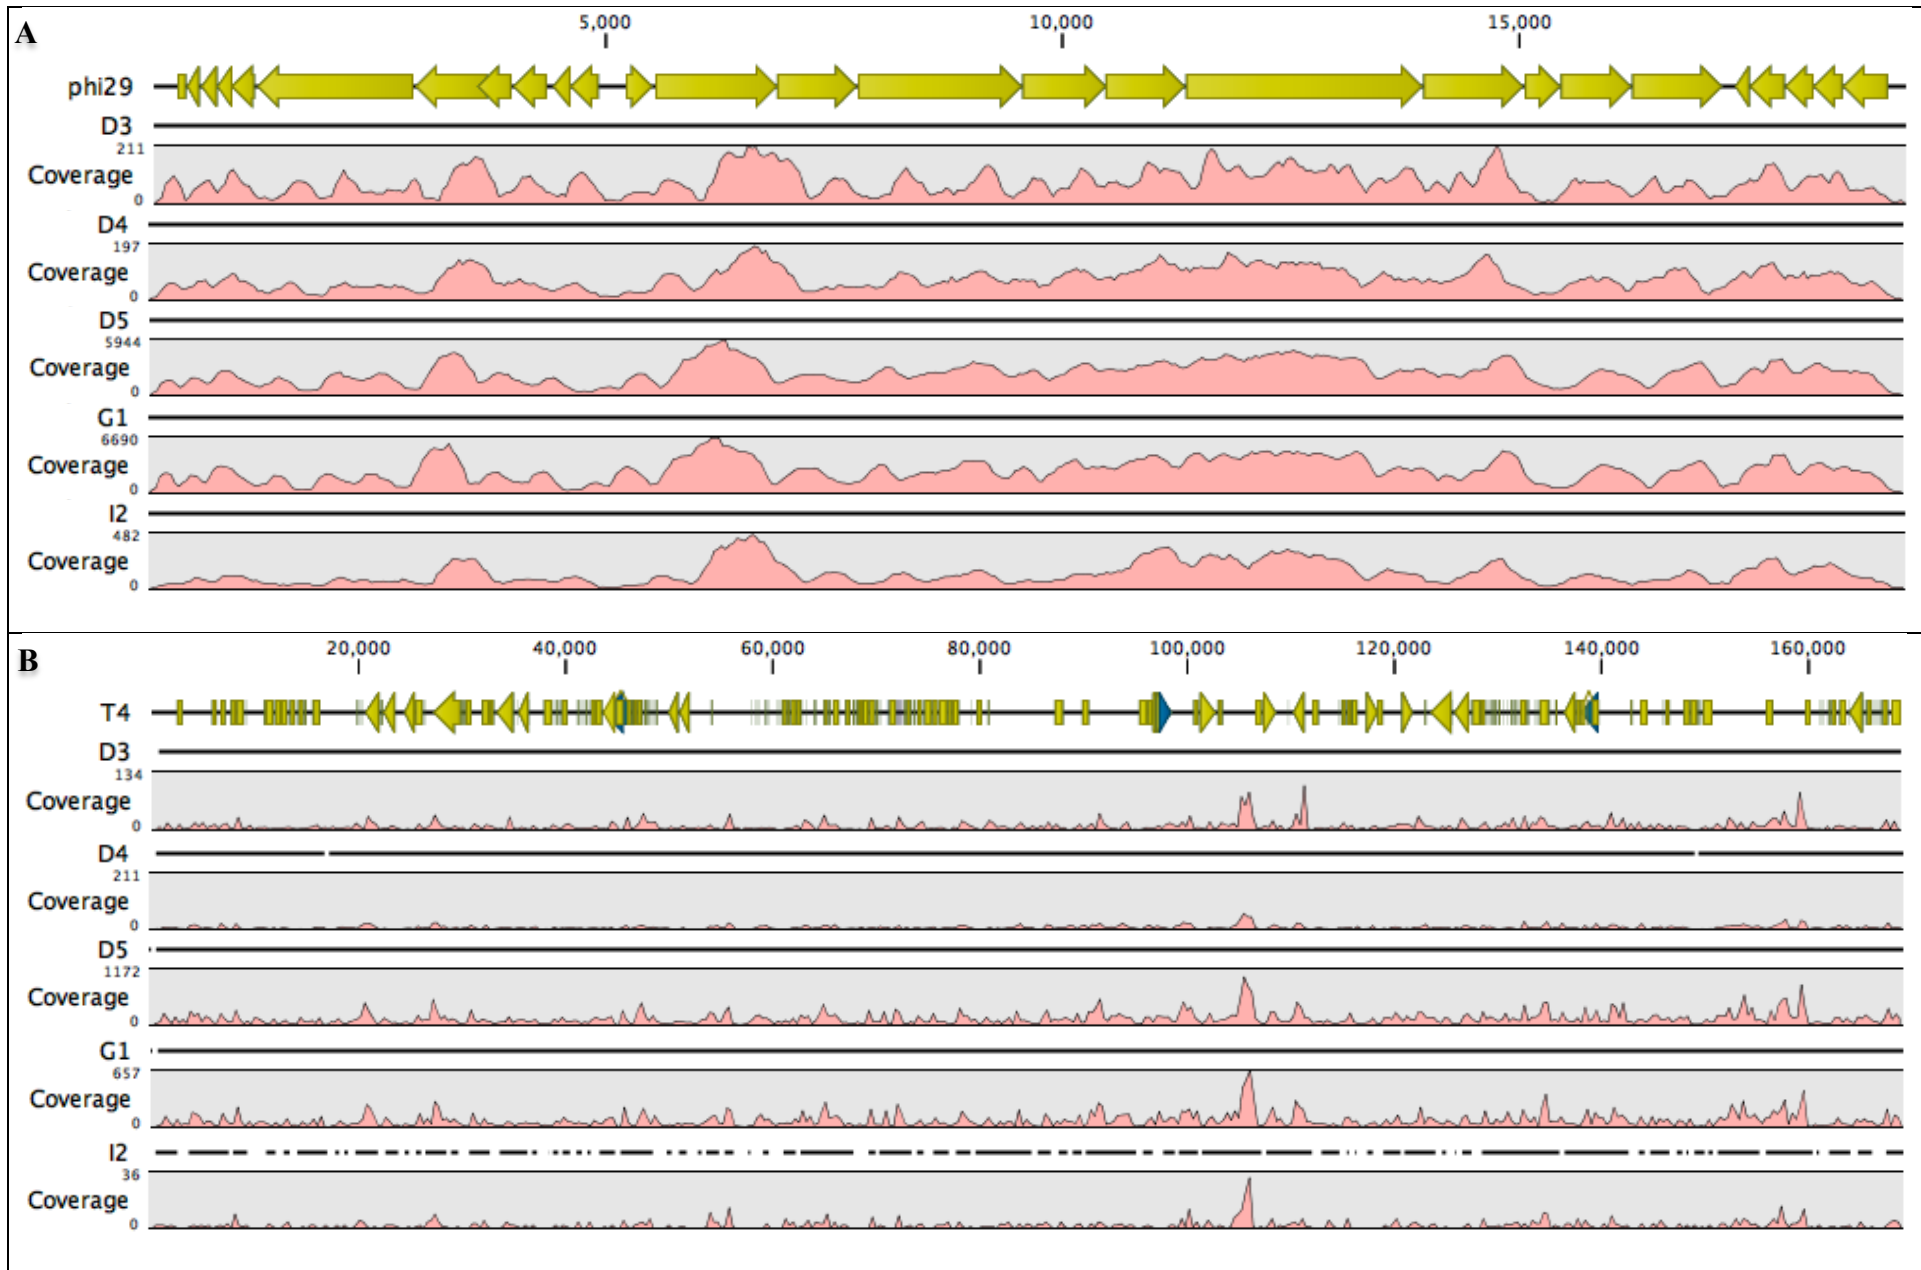

**Fig. S3.** Depth of coverage plots for the mapping of spiked phi29 (panel A) and T4 (panel B) sequences in mock communities. Coverage was assessed by mapping each metavirome dataset against phi29 and T4 reference genomes. X- and Y-axis represent the reference genome and coverage, respectively. Annotated genomes of phi29 and T4 phages are shown with nucleotide positions above the D3 mapping in the corresponding panels. The solid or broken lines above each coverage graph represent consensus sequences. Depth of coverage varies among the different samples, as indicated by the different scales on the Y-axis.

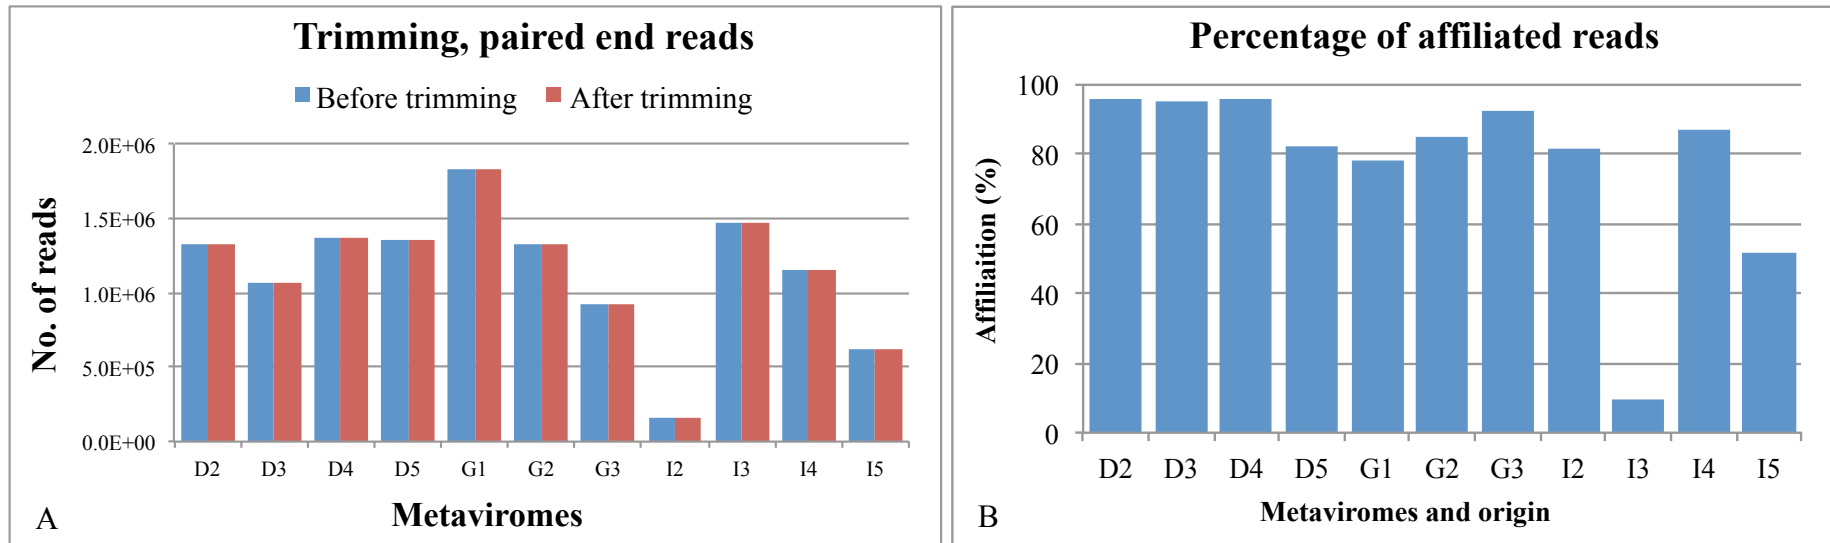

**Fig. S4.** (A) Metavirome sequence trimming prior to analysis. Trimming parameters were set to be as follows: trim Nextera XT adaptors, trim ambiguous nucleotides (limit = 2), trim low quality nucleotides (limit = 0.05), also search on reversed sequence, discard short reads after trimming (<15 nucleotides). (B) The fraction of metavirome sequences corresponding to dairy *Lc. lactis* and *Leuconostoc* phages. Analysis was run using the map-reads-to-reference function of CLC Genomics Workbench 8.5 (Qiagen, Denmark) using 50% minimum query length and 80% minimum identity thresholds, and using as references the genomes of dairy *Lc. lactis* and *Leuconostoc* phages available in GenBank until June 15 2016 and draft genomes obtained from in-house sources.

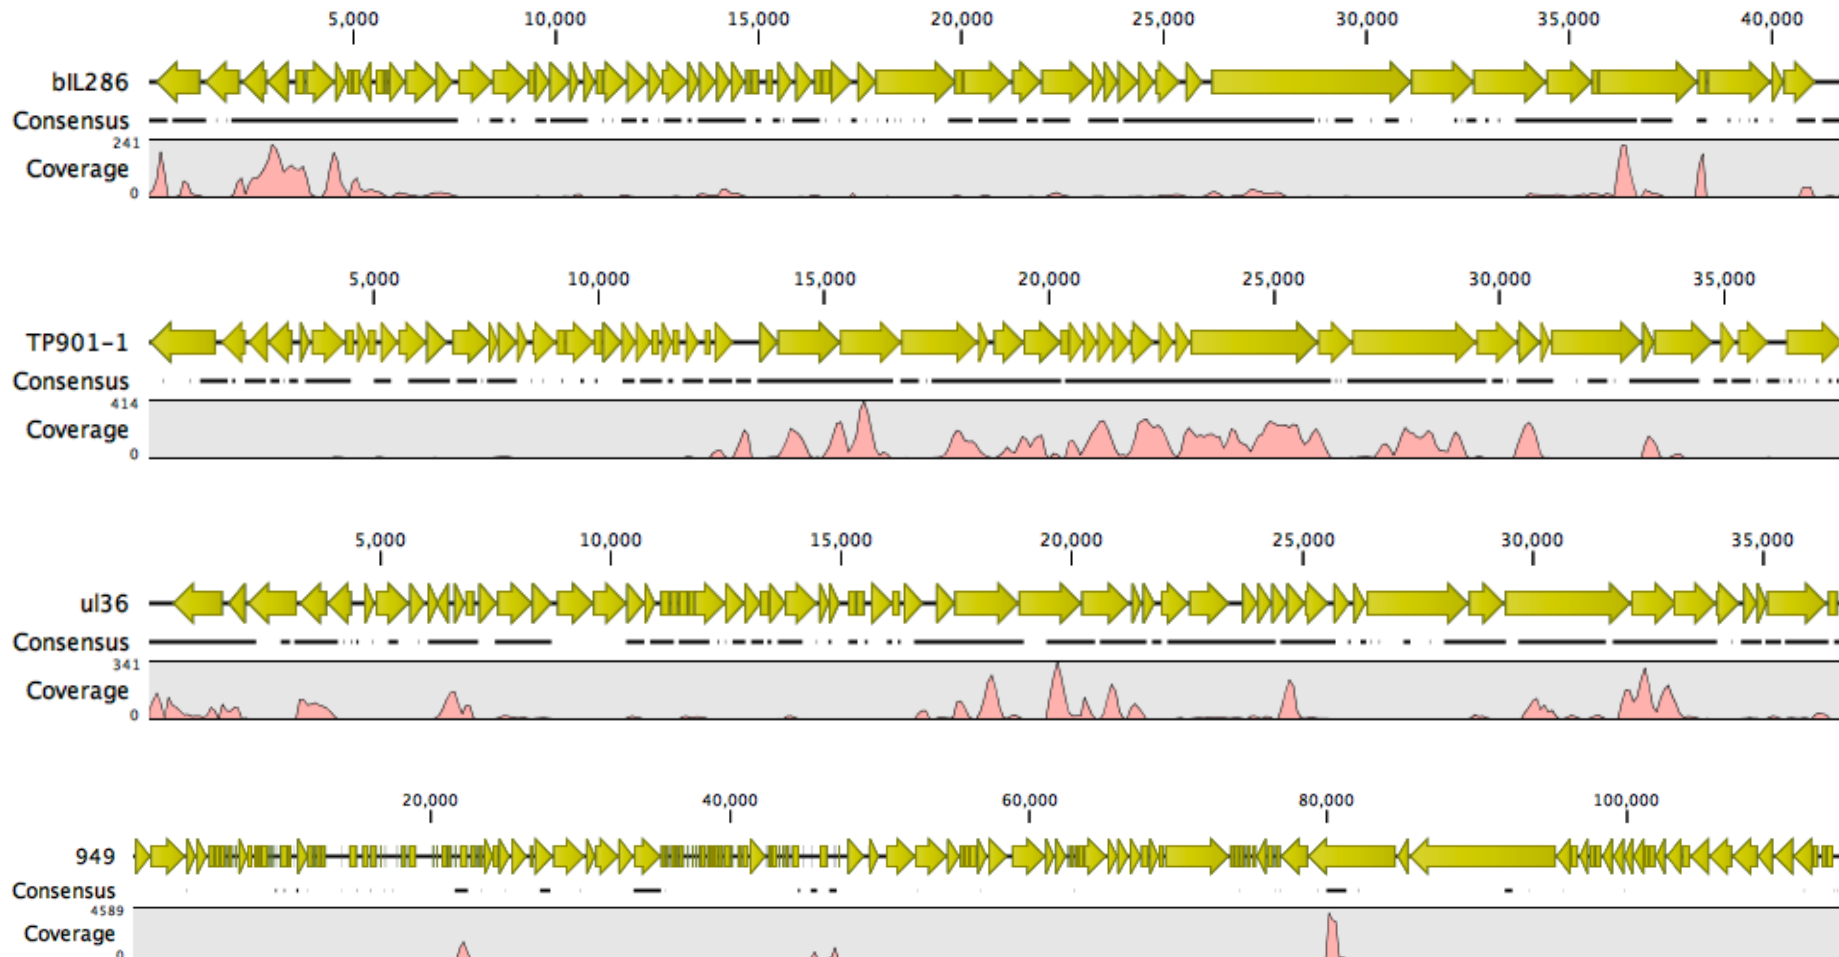

**Fig. S5.** Representative maps of TP901-1, bIL286, ul36 and 949 genomes with sequences of whey mixture metaviromes. X- and Y-axis represents the reference genome and coverage, respectively. The threshold for mapping in all cases was 50% minimum query length and 80% minimum identity. The regions with read coverage on the 949 genome correspond to *gp047*, *gp062*, *gt004*, *gp089-gt005* intergenic space, *gt005*, *gt006* and *gp128*.

## Supplementary Tables

**Table S1.** Composition of three Illumina NGS sequencing-simulated synthetic metaviromes (mock communities)

| Phage strain | Belong to<br>(phage species)   | Genome size<br>(bases) | <i>rbp</i> size<br>(bases) | RBP variant | Relative abundance |        |        |
|--------------|--------------------------------|------------------------|----------------------------|-------------|--------------------|--------|--------|
|              |                                |                        |                            |             | mock 1             | mock 2 | mock 3 |
| P680         | <i>Lc. lactis</i> 936          | 29631                  | 804                        | P113G       | 10.0               | 6.7    | -      |
| P008         | <i>Lc. lactis</i> 936          | 28538                  | 804                        | P113G       | 7.5                | 6.7    | -      |
| bIL170       | <i>Lc. lactis</i> 936          | 31754                  | 804                        | P113G       | 2.5                | 6.7    | -      |
| 712          | <i>Lc. lactis</i> 936          | 30510                  | 759                        | ASCC406     | 3.3                | 6.7    | 19.4   |
| jm2          | <i>Lc. lactis</i> 936          | 31090                  | 795                        | phage 7     | 11.7               | 6.7    | -      |
| phi7         | <i>Lc. lactis</i> 936          | 32382                  | 795                        | phage 7     | 4.2                | 6.7    | 13.9   |
| sk1          | <i>Lc. lactis</i> 936          | 28451                  | 795                        | fd13        | 12.5               | 6.7    | 5.6    |
| jj50         | <i>Lc. lactis</i> 936          | 27453                  | 795                        | fd13        | 10.8               | 6.7    | 11.1   |
| CaseusJM1    | <i>Lc. lactis</i> 936          | 30692                  | 795                        | fd13        | 9.2                | 6.7    | -      |
| jm3          | <i>Lc. lactis</i> 936          | 28674                  | 801                        | HD6         | 5.8                | 6.7    | -      |
| 340          | <i>Lc. lactis</i> 936          | 32337                  | 810                        | 645         | 5.0                | 6.7    | 22.2   |
| bIBB29       | <i>Lc. lactis</i> 936          | 29305                  | 810                        | 645         | 0.8                | 6.7    | -      |
| c2           | <i>Lc. lactis</i> c2           | 22172                  | 2121                       | c2          | 6.7                | 6.7    | 8.3    |
| phiLN34      | <i>Le. mesenteroides</i>       | 28022                  | 768                        | LNTR2       | 1.7                | 6.7    | 16.7   |
| phiLN6B      | <i>Le. pseudomesenteroides</i> | 25740                  | 933                        | LN6B        | 8.3                | 6.7    | 2.8    |

**Table S2.** The impact of varying the amount of input reads on phage relative abundance estimation. Entries are scores representing the percentage of reads mapped to reference genomes and were obtained from statistics generated from mapping of reads to the genome sequences of *Lc. lactis* and *Leuconostoc* phages. The mapping threshold was set to a minimum of 50% query length and 80% identity.

| Phage species      | Amount of input reads ( $10^2$ to $1.89 \times 10^7$ ), % mapped reads (entries) |                 |        |        |                 |        |                 |                 |        |                 |                 |        |                    |
|--------------------|----------------------------------------------------------------------------------|-----------------|--------|--------|-----------------|--------|-----------------|-----------------|--------|-----------------|-----------------|--------|--------------------|
|                    | $10^2$                                                                           | $5 \times 10^2$ | $10^3$ | $10^4$ | $5 \times 10^4$ | $10^5$ | $2 \times 10^5$ | $5 \times 10^5$ | $10^6$ | $2 \times 10^6$ | $5 \times 10^6$ | $10^7$ | $1.89 \times 10^7$ |
| 936                | 20.00                                                                            | 35.60           | 34.40  | 33.48  | 34.18           | 34.07  | 34.08           | 33.96           | 34.00  | 34.13           | 34.04           | 34.07  | 34.06              |
| P335               | -                                                                                | 1.20            | 2.00   | 1.80   | 1.69            | 1.80   | 1.71            | 1.73            | 1.71   | 1.71            | 1.71            | 1.72   | 1.72               |
| c2                 | -                                                                                | 2.20            | 1.10   | 1.69   | 1.48            | 1.45   | 1.42            | 1.50            | 1.47   | 1.48            | 1.48            | 1.48   | 1.48               |
| 1358               | -                                                                                | -               | -      | -      | 0.01            | 0.00   | 0.00            | 0.00            | 0.01   | 0.00            | 0.00            | 0.00   | 0.00               |
| P034               | -                                                                                | -               | -      | -      | -               | 0.00   | -               | 0.00            | 0.00   | 0.00            | 0.00            | 0.00   | 0.00               |
| 1706               | -                                                                                | -               | -      | 0.02   | 0.01            | 0.01   | 0.01            | 0.01            | 0.01   | 0.01            | 0.01            | 0.01   | 0.01               |
| Q54                | -                                                                                | -               | -      | 0.20   | 0.09            | 0.11   | 0.11            | 0.10            | 0.11   | 0.11            | 0.10            | 0.10   | 0.10               |
| KSY1               | -                                                                                | -               | -      | -      | 0.01            | 0.01   | 0.01            | 0.01            | 0.01   | 0.01            | 0.01            | 0.01   | 0.01               |
| P087               | -                                                                                | -               | -      | 0.02   | 0.04            | 0.05   | 0.04            | 0.05            | 0.04   | 0.04            | 0.04            | 0.04   | 0.04               |
| 949                | -                                                                                | 0.60            | 0.40   | 0.73   | 0.61            | 0.63   | 0.61            | 0.63            | 0.62   | 0.62            | 0.62            | 0.62   | 0.62               |
| <i>Leuconostoc</i> | -                                                                                | -               | -      | 0.05   | 0.03            | 0.04   | 0.05            | 0.05            | 0.05   | 0.04            | 0.04            | 0.04   | 0.04               |
| Sattelites         | -                                                                                | -               | -      | 0.06   | 0.03            | 0.03   | 0.03            | 0.02            | 0.03   | 0.02            | 0.02            | 0.03   | 0.02               |



**Table S3.** Summary of *de novo* assembly and BLAST analysis of spiked phages

| Meta-<br>genomes | phi29                   |                |                     |                |                 |               |              | T4                      |                |                     |                |                 |               |              |
|------------------|-------------------------|----------------|---------------------|----------------|-----------------|---------------|--------------|-------------------------|----------------|---------------------|----------------|-----------------|---------------|--------------|
|                  | <i>De novo</i> assembly |                |                     | BLAST analysis |                 |               |              | <i>De novo</i> assembly |                |                     | BLAST analysis |                 |               |              |
|                  | Contig<br>length        | Reads<br>count | Average<br>coverage | E-<br>value    | Identity<br>(%) | HSP<br>length | Bit<br>score | Contig<br>length        | Reads<br>count | Average<br>coverage | E-<br>value    | Identity<br>(%) | HSP<br>length | Bit<br>score |
| D3               | 19226                   | 8769           | 78.2                | 0.00           | 100             | 19223         | 34653.0      | 1737                    | 64             | 6.1                 | 0.00           | 100             | 1750          | 3133.7       |
| D4               | 19281                   | 7188           | 73.8                | 0.00           | 100             | 19258         | 34716.1      | 3193                    | 165            | 10.3                | 0.00           | 100             | 2426          | 4369.0       |
| D5               | 19276                   | 212820         | 2347.9              | 0.00           | 100             | 19273         | 34743.2      | 168032                  | 115910         | 142.7               | 0.00           | 100             | 49334         | 88501.6      |
| G1               | 19274                   | 248435         | 2585.8              | 0.00           | 100             | 19271         | 34739.6      | 104664                  | 51199          | 85.8                | 0.00           | 100             | 26462         | 47402.8      |
| I2               | 19265                   | 11670          | 132.3               | 0.00           | 100             | 19262         | 34723.3      | 2793                    | 125            | 10.7                | 0.00           | 100             | 2156          | 3887.5       |

HSP: high-scoring segment pairs

**Table S4.** BLAST comparison of contigs of the highest average read coverage (total reads contigs)

| Contigs | Average coverage | Size | Number of HSPs | Lowest E-value | Greatest identity % | Greatest positive % | Greatest HSP length | Greatest bit score | BLAST hit description                               | Accession |
|---------|------------------|------|----------------|----------------|---------------------|---------------------|---------------------|--------------------|-----------------------------------------------------|-----------|
| D2_8    | 7197             | 371  | 121            | 0.0            | 100                 | 100                 | 272                 | 481                | <i>Lactococcus</i> phage CaseusJM1, complete genome | KC522412  |
| D2_85   | 6290             | 700  | 105            | 0.0            | 97                  | 97                  | 714                 | 1063               | <i>Lactococcus</i> phage ASCC454, complete genome   | JQ740802  |
| D2_104  | 7246             | 584  | 111            | 0.0            | 100                 | 100                 | 584                 | 1000               | <i>Lactococcus</i> phage jm3, complete genome       | KC182547  |
| D2_144  | 13147            | 608  | 103            | 0.0            | 100                 | 100                 | 609                 | 1035               | <i>Lactococcus</i> phage phi145, complete genome    | KM091444  |
| D2_156  | 5805             | 653  | 139            | 0.0            | 100                 | 100                 | 662                 | 1063               | <i>Lactococcus</i> phage phi7, complete genome      | KC182552  |
| D2_169  | 5460             | 1592 | 180            | 0.0            | 99                  | 99                  | 896                 | 1550               | <i>Lactococcus</i> phage CB20, complete genome      | FJ848885  |
| D2_170  | 9123             | 692  | 124            | 0.0            | 100                 | 100                 | 702                 | 1177               | <i>Lactococcus</i> phage ASCC544, complete genome   | JQ740814  |
| D2_261  | 8330             | 1061 | 107            | 0.0            | 100                 | 100                 | 1061                | 1779               | <i>Lactococcus</i> phage CB14, complete genome      | FJ848883  |
| D2_271  | 13080            | 274  | 105            | 0.0            | 100                 | 100                 | 274                 | 477                | <i>Lactococcus</i> phage P680, complete genome      | KC182551  |
| D2_319  | 5416             | 567  | 104            | 0.0            | 100                 | 100                 | 567                 | 982                | <i>Lactococcus</i> phage SL4, complete genome       | FJ848881  |
| D3_7    | 4259             | 3437 | 179            | 0.0            | 100                 | 100                 | 3424                | 5025               | <i>Lactococcus</i> phage bIBB29, complete genome    | EU221285  |
| D3_10   | 4014             | 712  | 171            | 0.0            | 95                  | 95                  | 710                 | 885                | <i>Lactococcus</i> phage ASCC191, complete genome   | JQ740787  |
| D3_12   | 3202             | 6696 | 367            | 0.0            | 100                 | 100                 | 2907                | 4145               | <i>Lactococcus</i> phage CaseusJM1, complete genome | KC522412  |
| D3_13   | 2774             | 2384 | 142            | 0.0            | 100                 | 100                 | 2385                | 3709               | <i>Lactococcus</i> phage phi15, complete genome     | KM091442  |
| D3_18   | 4508             | 1616 | 96             | 0.0            | 100                 | 100                 | 1630                | 2629               | <i>Lactococcus</i> phage CB20, complete genome      | FJ848885  |
| D3_19   | 3465             | 2177 | 142            | 0.0            | 100                 | 100                 | 2190                | 3453               | <i>Lactococcus</i> phage CaseusJM1, complete genome | KC522412  |
| D3_20   | 2779             | 2497 | 150            | 0.0            | 100                 | 100                 | 2511                | 4021               | <i>Lactococcus</i> phage P680, complete genome      | KC182551  |
| D3_23   | 3180             | 760  | 101            | 0.0            | 100                 | 100                 | 760                 | 1267               | <i>Lactococcus</i> phage phi15, complete genome     | KM091442  |
| D3_53   | 3515             | 2291 | 285            | 0.0            | 100                 | 100                 | 1704                | 2416               | <i>Lactococcus</i> phage CB13, complete genome      | FJ848882  |
| D3_116  | 2751             | 797  | 101            | 0.0            | 98                  | 98                  | 797                 | 1307               | <i>Lactococcus</i> phage fd13, complete genome      | KC182545  |
| D4_5    | 4271             | 5330 | 427            | 0.0            | 100                 | 100                 | 2622                | 3549               | <i>Lactococcus</i> phage CaseusJM1, complete genome | KC522412  |
| D4_7    | 5050             | 7845 | 367            | 0.0            | 100                 | 100                 | 4103                | 6019               | <i>Lactococcus</i> phage CaseusJM1, complete genome | KC522412  |
| D4_9    | 7886             | 4258 | 329            | 0.0            | 100                 | 100                 | 4258                | 6374               | Bacteriophage bIL170, complete genome               | AF009630  |
| D4_22   | 4108             | 1543 | 154            | 0.0            | 100                 | 100                 | 1541                | 2358               | <i>Lactococcus</i> phage bIBB29, complete genome    | EU221285  |
| D4_33   | 3981             | 2322 | 142            | 0.0            | 100                 | 100                 | 2360                | 3702               | Phage 645, complete genome                          | KC182543  |
| D4_55   | 4229             | 3184 | 307            | 0.0            | 100                 | 100                 | 1909                | 2580               | <i>Lactococcus</i> phage CB13, complete genome      | FJ848882  |
| D4_89   | 4376             | 1377 | 105            | 0.0            | 100                 | 100                 | 1380                | 2095               | Phage P475, complete genome                         | KC182550  |
| D4_91   | 7932             | 754  | 102            | 0.0            | 100                 | 100                 | 754                 | 1280               | <i>Lactococcus</i> phage jm3, complete genome       | KC182547  |
| D4_92   | 5730             | 909  | 108            | 0.0            | 100                 | 100                 | 909                 | 1532               | <i>Lactococcus</i> phage phi15, complete genome     | KM091442  |
| D4_96   | 4155             | 863  | 147            | 0.0            | 100                 | 100                 | 708                 | 1121               | <i>Lactococcus</i> phage CaseusJM1, complete genome | KC522412  |
| D5_17   | 7032             | 511  | 158            | 0.0            | 100                 | 100                 | 511                 | 872                | <i>Lactococcus</i> phage P008, complete genome      | DQ054536  |

|        |       |       |      |     |     |     |       |       |                                                      |          |
|--------|-------|-------|------|-----|-----|-----|-------|-------|------------------------------------------------------|----------|
| D5_51  | 9341  | 440   | 105  | 0.0 | 100 | 100 | 441   | 759   | <i>Lactococcus</i> phage phi7, complete genome       | KC182552 |
| D5_52  | 6271  | 356   | 105  | 0.0 | 100 | 100 | 357   | 616   | Phage p272, complete genome                          | KC182549 |
| D5_62  | 8748  | 815   | 104  | 0.0 | 100 | 100 | 815   | 1412  | <i>Lactococcus</i> phage CB14, complete genome       | FJ848883 |
| D5_108 | 4827  | 506   | 141  | 0.0 | 100 | 100 | 509   | 800   | <i>Lactococcus</i> phage ASCC506, complete genome    | JQ740810 |
| D5_186 | 7322  | 492   | 128  | 0.0 | 100 | 100 | 492   | 829   | <i>Lactococcus</i> phage CB14, complete genome       | FJ848883 |
| D5_187 | 6722  | 474   | 101  | 0.0 | 100 | 100 | 471   | 827   | <i>Lactococcus</i> phage SL4, complete genome        | FJ848881 |
| D5_194 | 5241  | 632   | 100  | 0.0 | 100 | 100 | 632   | 1082  | <i>Lactococcus</i> phage ASCC544, complete genome    | JQ740814 |
| D5_204 | 7303  | 447   | 107  | 0.0 | 100 | 100 | 457   | 733   | <i>Lactococcus</i> phage phi145, complete genome     | KM091444 |
| D5_378 | 8062  | 420   | 105  | 0.0 | 100 | 100 | 420   | 710   | <i>Lactococcus</i> phage SL4, complete genome        | FJ848881 |
| G1_1   | 16145 | 30652 | 1836 | 0.0 | 100 | 100 | 11135 | 14302 | <i>Lactococcus</i> phage CB20, complete genome       | FJ848885 |
| G1_9   | 2586  | 19274 | 161  | 0.0 | 100 | 100 | 19271 | 34740 | <i>Bacillus</i> phage phi29, complete genome         | EU771092 |
| G1_12  | 1101  | 438   | 122  | 0.0 | 97  | 97  | 438   | 705   | <i>Lactococcus</i> phage bIBB29, complete genome     | EU221285 |
| G1_19  | 1297  | 397   | 100  | 0.0 | 100 | 100 | 395   | 618   | Bacteriophage US3 lytA gene, complete cds            | M90423   |
| G1_21  | 2210  | 743   | 103  | 0.0 | 100 | 100 | 743   | 1192  | Phage 645, complete genome                           | KC182543 |
| G1_22  | 944   | 25715 | 284  | 0.0 | 100 | 100 | 20711 | 31605 | <i>Leuconostoc</i> phage phiLN04, complete genome    | KC013023 |
| G1_31  | 879   | 455   | 240  | 0.0 | 100 | 100 | 455   | 528   | <i>Lactococcus</i> phage ASCC532, complete genome    | JQ740813 |
| G1_52  | 753   | 437   | 111  | 0.0 | 100 | 100 | 435   | 705   | Phage p272, complete genome                          | KC182549 |
| G1_115 | 686   | 549   | 243  | 0.0 | 100 | 100 | 549   | 638   | <i>Lactococcus</i> phage ASCC191, complete genome    | JQ740787 |
| G1_124 | 1072  | 508   | 105  | 0.0 | 100 | 100 | 506   | 809   | <i>Lactococcus</i> phage jm3, complete genome        | KC182547 |
| G2_5   | 3839  | 19878 | 1222 | 0.0 | 100 | 100 | 15284 | 21456 | <i>Lactococcus</i> phage CB19, complete genome       | FJ848884 |
| G2_9   | 5875  | 6935  | 392  | 0.0 | 100 | 100 | 6198  | 7960  | <i>Lactococcus</i> phage SL4, complete genome        | FJ848881 |
| G2_48  | 4815  | 2996  | 172  | 0.0 | 100 | 100 | 1630  | 2463  | <i>Lactococcus</i> phage ASCC544, complete genome    | JQ740814 |
| G2_52  | 5783  | 2268  | 139  | 0.0 | 97  | 97  | 2187  | 3466  | <i>Lactococcus lactis</i> phage 645, complete genome | KC182543 |
| G2_53  | 5024  | 4079  | 155  | 0.0 | 100 | 100 | 4097  | 6284  | <i>Lactococcus</i> phage jm3, complete genome        | KC182547 |
| G2_54  | 6042  | 2546  | 142  | 0.0 | 100 | 100 | 2546  | 4021  | <i>Lactococcus</i> phage CB20, complete genome       | FJ848885 |
| G2_60  | 4271  | 1698  | 106  | 0.0 | 100 | 100 | 1716  | 2802  | <i>Lactococcus</i> phage jm3, complete genome        | KC182547 |
| G2_97  | 3949  | 1248  | 101  | 0.0 | 96  | 96  | 1248  | 2003  | <i>Lactococcus</i> phage jm3, complete genome        | KC182547 |
| G2_111 | 5244  | 731   | 75   | 0.0 | 91  | 91  | 712   | 852   | <i>Lactococcus</i> phage fd13, complete genome       | KC182545 |
| G2_123 | 4113  | 1062  | 104  | 0.0 | 100 | 100 | 1062  | 1763  | <i>Lactococcus</i> phage P680, complete genome       | KC182551 |
| G3_3   | 7894  | 21898 | 2457 | 0.0 | 100 | 100 | 4081  | 5262  | <i>Lactococcus</i> phage ASCC544, complete genome    | JQ740814 |
| G3_5   | 6707  | 5786  | 0    |     |     |     |       |       | NA                                                   | NA       |
| G3_8   | 3695  | 3904  | 0    |     |     |     |       |       | NA                                                   | NA       |
| G3_9   | 3062  | 1750  | 0    |     |     |     |       |       | NA                                                   | NA       |
| G3_10  | 2607  | 7095  | 561  | 0.0 | 96  | 96  | 4648  | 6055  | <i>Lactococcus</i> phage PhiLj, complete genome      | KP793133 |

|          |       |       |      |     |     |     |       |       |                                                     |          |
|----------|-------|-------|------|-----|-----|-----|-------|-------|-----------------------------------------------------|----------|
| G3_21    | 2142  | 7267  | 950  | 0.0 | 100 | 100 | 2563  | 3240  | <i>Lactococcus</i> phage ASCC365, complete genome   | JQ740797 |
| G3_23    | 9309  | 1051  | 196  | 0.0 | 100 | 100 | 1061  | 1628  | <i>Lactococcus</i> phage PhiL.6, complete genome    | KP793122 |
| G3_27    | 2426  | 4194  | 475  | 0.0 | 99  | 99  | 4201  | 6784  | <i>Lactococcus</i> phage ASCC397, complete genome   | JQ740800 |
| G3_32    | 2025  | 2129  | 286  | 0.0 | 97  | 97  | 1271  | 1815  | <i>Lactococcus</i> phage PhiS0139, complete genome  | KP793134 |
| G3_49    | 15681 | 1303  | 100  | 0.0 | 97  | 97  | 1302  | 2118  | <i>Lactococcus</i> phage ASCC544, complete genome   | JQ740814 |
| I2_1     | 1712  | 30122 | 1614 | 0.0 | 100 | 100 | 12707 | 21582 | <i>Lactococcus</i> phage jm2, complete genome       | KC182546 |
| I2_2     | 291   | 3765  | 109  | 0.0 | 100 | 100 | 3781  | 6737  | <i>Lactococcus</i> phage CaseusJM1, complete genome | KC522412 |
| I2_3     | 643   | 8132  | 590  | 0.0 | 100 | 100 | 8132  | 14275 | <i>Lactococcus</i> phage CaseusJM1, complete genome | KC522412 |
| I2_5     | 224   | 5826  | 656  | 0.0 | 100 | 100 | 2779  | 4809  | <i>Lactococcus</i> phage CaseusJM1, complete genome | KC522412 |
| I2_6     | 283   | 7790  | 688  | 0.0 | 100 | 100 | 3881  | 6975  | <i>Lactococcus</i> phage CaseusJM1, complete genome | KC522412 |
| I2_7     | 132   | 19265 | 161  | 0.0 | 100 | 100 | 19262 | 34723 | <i>Bacillus</i> phage phi29, complete genome        | EU771092 |
| I2_9     | 135   | 400   | 110  | 0.0 | 100 | 100 | 414   | 679   | <i>Lactococcus</i> phage jm2, complete genome       | KC182546 |
| I2_12    | 217   | 2549  | 146  | 0.0 | 100 | 100 | 2564  | 4598  | <i>Lactococcus</i> phage CaseusJM1, complete genome | KC522412 |
| I2_425   | 113   | 702   | 104  | 0.0 | 98  | 98  | 716   | 1170  | <i>Lactococcus</i> phage jm2, complete genome       | KC182546 |
| I2_426   | 414   | 472   | 113  | 0.0 | 100 | 100 | 472   | 852   | <i>Lactococcus</i> phage jm2, complete genome       | KC182546 |
| I3_58    | 1681  | 626   | 0    |     |     |     |       |       | NA                                                  | NA       |
| I3_79    | 1822  | 594   | 0    |     |     |     |       |       | NA                                                  | NA       |
| I3_82    | 1874  | 5344  | 973  | 0.0 | 100 | 100 | 4973  | 6030  | <i>Strep. pneumoniae</i> AP200, complete genome     | CP002121 |
| I3_107   | 4576  | 1451  | 176  | 0.0 | 100 | 100 | 476   | 425   | <i>Strep. pyogenes</i> MGAS315, complete genome     | AE014074 |
| I3_115   | 4347  | 904   | 125  | 0.0 | 100 | 100 | 836   | 201   | <i>Strep. pyogenes</i> MGAS2096, complete genome    | CP000261 |
| I3_147   | 5315  | 2396  | 103  | 0.0 | 100 | 100 | 2162  | 3875  | <i>Lactococcus</i> phage TP712, complete sequence   | AY766464 |
| I3_148   | 999   | 648   | 105  | 0.0 | 100 | 100 | 375   | 124   | <i>Strep. epidermidis</i> RP62A, complete genome    | CP000029 |
| I3_151   | 1937  | 872   | 116  | 0.0 | 100 | 100 | 795   | 236   | <i>Strep. pyogenes</i> NZ131, complete genome       | CP000829 |
| I3_191   | 987   | 1341  | 91   | 0.0 | 100 | 100 | 153   | 55    | <i>Strep. pyogenes</i> M1 GAS, complete genome      | AE004092 |
| I3_21166 | 1345  | 619   | 59   | 0.0 | 95  | 95  | 600   | 364   | <i>Strep. pyogenes</i> MGAS2096, complete genome    | CP000261 |
| I4_1     | 16184 | 3056  | 120  | 0.0 | 100 | 100 | 3069  | 4301  | Bacteriophage c2 complete genome                    | L48605   |
| I4_2     | 5797  | 3083  | 106  | 0.0 | 100 | 100 | 3088  | 4221  | <i>Lactococcus</i> phage bIL67, complete genome     | L33769   |
| I4_4     | 15581 | 2310  | 67   | 0.0 | 100 | 100 | 2306  | 3018  | Bacteriophage c2 complete genome                    | L48605   |
| I4_5     | 11369 | 1285  | 52   | 0.0 | 100 | 100 | 1285  | 1612  | Bacteriophage c2 complete genome                    | L48605   |
| I4_6     | 18480 | 5516  | 117  | 0.0 | 100 | 100 | 4012  | 5722  | Bacteriophage c2 complete genome                    | L48605   |
| I4_7     | 15697 | 4902  | 143  | 0.0 | 100 | 100 | 1749  | 2091  | Bacteriophage c2 complete genome                    | L48605   |
| I4_9     | 13558 | 6482  | 175  | 0.0 | 100 | 100 | 1708  | 2614  | Bacteriophage c2 complete genome                    | L48605   |
| I4_13    | 5721  | 1615  | 109  | 0.0 | 100 | 100 | 1615  | 2301  | <i>Lactococcus</i> phage Rc16 genes, complete cds   | AY570987 |
| I4_19    | 8125  | 880   | 104  | 0.0 | 100 | 100 | 880   | 1255  | Bacteriophage c2 complete genome                    | L48605   |

|       |      |       |     |     |     |     |      |       |                                                   |          |
|-------|------|-------|-----|-----|-----|-----|------|-------|---------------------------------------------------|----------|
| I4_25 | 4768 | 648   | 103 | 0.0 | 95  | 95  | 648  | 871   | Bacteriophage c2 complete genome                  | L48605   |
| I5_9  | 1142 | 1188  | 133 | 0.0 | 100 | 100 | 717  | 901   | Bacteriophage c2 complete genome                  | L48605   |
| I5_10 | 5284 | 21527 | 187 | 0.0 | 100 | 100 | 7326 | 10235 | <i>Lactococcus</i> phage bIL67, complete genome   | L33769   |
| I5_12 | 2248 | 1215  | 103 | 0.0 | 100 | 100 | 1215 | 1657  | <i>Lactococcus</i> phage Rc16 genes, complete cds | AY570987 |
| I5_13 | 1630 | 5622  | 171 | 0.0 | 100 | 100 | 1708 | 2614  | Bacteriophage c2 complete genome                  | L48605   |
| I5_14 | 2529 | 1640  | 112 | 0.0 | 100 | 100 | 1639 | 2337  | Bacteriophage c2 complete genome                  | L48605   |
| I5_16 | 1478 | 1627  | 111 | 0.0 | 100 | 100 | 1625 | 2358  | <i>Lactococcus</i> phage Rc16 genes, complete cds | AY570987 |
| I5_25 | 2691 | 4014  | 128 | 0.0 | 100 | 100 | 2028 | 2760  | Bacteriophage c2 complete genome                  | L48605   |
| I5_36 | 1148 | 1050  | 0   |     |     |     |      |       | NA                                                | NA       |
| I5_39 | 2061 | 3236  | 120 | 0.0 | 100 | 100 | 3248 | 4457  | Bacteriophage c2 complete genome                  | L48605   |
| I5_40 | 1445 | 5039  | 109 | 0.0 | 100 | 100 | 5009 | 6804  | Bacteriophage c2 complete genome                  | L48605   |

HSP: high-scoring segment pairs, D: Denmark, G: Germany, I: Ireland, NA: Not available

**Table S5.** BLAST comparison of contigs of the longest sizes (total reads contigs)

| Contigs | Average coverage | Size  | Number of HSPs | Lowest E-value | Greatest identity % | Greatest positive % | Greatest HSP length | Greatest bit score | BLAST hit description                                  | Accession |
|---------|------------------|-------|----------------|----------------|---------------------|---------------------|---------------------|--------------------|--------------------------------------------------------|-----------|
| D2_7    | 4181             | 5283  | 554            | 0              | 100                 | 100                 | 2551                | 3532               | <i>Lactococcus</i> phage phi15, complete genome        | KM091442  |
| D2_10   | 2229             | 10734 | 763            | 0              | 99                  | 99                  | 3186                | 2989               | <i>Lactococcus</i> phage CaseusJM1, complete genome    | KC522412  |
| D2_17   | 1704             | 11070 | 1251           | 0              | 100                 | 100                 | 2582                | 3296               | <i>Lactococcus</i> phage CB13, complete genome         | FJ848882  |
| D2_18   | 3689             | 6263  | 700            | 0              | 100                 | 100                 | 2760                | 3316               | <i>Lactococcus lactis</i> phage p272, complete genome  | KC182549  |
| D2_22   | 4193             | 6225  | 410            | 0              | 100                 | 100                 | 5166                | 6428               | <i>Lactococcus</i> phage CaseusJM1, complete genome    | KC522412  |
| D2_229  | 314              | 27483 | 306            | 0              | 98                  | 98                  | 9357                | 12796              | <i>Lactococcus</i> phage bIL67, complete genome        | L33769    |
| D2_341  | 69               | 15126 | 149            | 0              | 100                 | 100                 | 10108               | 11680              | <i>Lactococcus</i> phage bIL67, complete genome        | L33769    |
| D2_412  | 60               | 33441 | 768            | 0              | 100                 | 100                 | 21930               | 38415              | <i>Lactobacillus</i> phage Ld25A, complete genome      | KJ564036  |
| D2_717  | 8                | 8060  | 136            | 0              | 100                 | 100                 | 57                  | 54                 | <i>Staphylococcus aureus</i> 04-02981, complete genome | CP001844  |
| D2_762  | 4                | 5487  | 220            | 0              | 97                  | 97                  | 2118                | 1931               | <i>Streptococcus</i> phage TP-J34 complete genome      | HE861935  |
| D3_2    | 736              | 4816  | 267            | 0              | 100                 | 100                 | 3405                | 4973               | <i>Lactococcus</i> phage ASCC324, complete genome      | JQ740793  |
| D3_4    | 1572             | 6001  | 355            | 0              | 98                  | 98                  | 2788                | 3707               | <i>Lactococcus lactis</i> phage p2, complete genome    | GQ979703  |
| D3_11   | 2747             | 20699 | 1563           | 0              | 100                 | 100                 | 12255               | 19276              | <i>Lactococcus lactis</i> phage P475, complete genome  | KC182550  |
| D3_12   | 3202             | 6696  | 367            | 0              | 100                 | 100                 | 2907                | 4145               | <i>Lactococcus</i> phage CaseusJM1, complete genome    | KC522412  |
| D3_14   | 2639             | 17770 | 1334           | 0              | 100                 | 100                 | 5167                | 5895               | <i>Lactococcus</i> phage SL4, complete genome          | FJ848881  |
| D3_28   | 650              | 11167 | 1039           | 0              | 100                 | 100                 | 2900                | 4656               | <i>Lactococcus</i> phage CaseusJM1, complete genome    | KC522412  |
| D3_40   | 574              | 5423  | 511            | 0              | 100                 | 100                 | 3838                | 4872               | <i>Lactococcus</i> phage P680, complete genome         | KC182551  |
| D3_75   | 1369             | 6270  | 601            | 0              | 100                 | 100                 | 2427                | 3173               | <i>Lactococcus</i> phage ASCC544, complete genome      | JQ740814  |
| D3_137  | 78               | 19226 | 161            | 0              | 100                 | 100                 | 19223               | 34653              | <i>Bacillus</i> phage phi29, complete genome           | EU771092  |
| D3_191  | 8                | 5421  | 200            | 0              | 100                 | 100                 | 4464                | 7630               | Bacteriophage S13 circular DNA, complete genome        | M14428    |
| D4_1    | 2098             | 11364 | 822            | 0              | 98                  | 98                  | 4329                | 4988               | <i>Lactococcus</i> phage SL4, complete genome          | FJ848881  |
| D4_2    | 2752             | 8147  | 712            | 0              | 100                 | 100                 | 5744                | 9285               | <i>Lactococcus lactis</i> phage P475, complete genome  | KC182550  |
| D4_6    | 2730             | 11682 | 559            | 0              | 97                  | 97                  | 8513                | 11824              | <i>Lactococcus</i> phage SL4, complete genome          | FJ848881  |
| D4_7    | 5050             | 7845  | 367            | 0              | 100                 | 100                 | 4103                | 6019               | <i>Lactococcus</i> phage CaseusJM1, complete genome    | KC522412  |
| D4_10   | 1123             | 8871  | 429            | 0              | 100                 | 100                 | 7490                | 10295              | <i>Lactococcus</i> phage ASCC287, complete genome      | JQ740791  |
| D4_11   | 1911             | 11507 | 859            | 0              | 98                  | 98                  | 2447                | 3150               | <i>Lactococcus lactis</i> phage p2, complete genome    | GQ979703  |
| D4_12   | 717              | 9050  | 764            | 0              | 100                 | 100                 | 3004                | 4759               | <i>Lactococcus</i> phage CaseusJM1, complete genome    | KC522412  |
| D4_16   | 1035             | 9383  | 784            | 0              | 100                 | 100                 | 3797                | 4549               | <i>Lactococcus</i> phage ASCC497, complete genome      | JQ740808  |
| D4_17   | 1699             | 9150  | 810            | 0              | 100                 | 100                 | 3921                | 4654               | <i>Lactococcus</i> phage phi7, complete genome         | KC182552  |
| D4_118  | 74               | 19281 | 161            | 0              | 100                 | 100                 | 19258               | 34716              | <i>Bacillus</i> phage phi29, complete genome           | EU771092  |
| D5_3    | 849              | 13293 | 795            | 0              | 99                  | 99                  | 3723                | 4466               | <i>Lactococcus</i> phage CB20, complete genome         | FJ848885  |

|        |       |        |      |   |     |     |       |       |                                                        |          |
|--------|-------|--------|------|---|-----|-----|-------|-------|--------------------------------------------------------|----------|
| D5_24  | 168   | 25687  | 288  | 0 | 100 | 100 | 23947 | 40673 | <i>Leuconostoc</i> phage phiLN6B, complete genome      | KC013024 |
| D5_47  | 143   | 168032 | 7561 | 0 | 100 | 100 | 49334 | 88502 | <i>Enterobacteria</i> phage RB59, complete genome      | KM607003 |
| D5_53  | 48    | 18647  | 511  | 0 | 100 | 100 | 3204  | 5350  | <i>Lactococcus</i> bacteriophage phi31                 | AJ292531 |
| D5_77  | 2348  | 19276  | 161  | 0 | 100 | 100 | 19273 | 34743 | <i>Bacillus</i> phage phi29, complete genome           | EU771092 |
| D5_230 | 41    | 31258  | 131  | 0 | 100 | 100 | 87    | 64    | <i>Shewanella piezotolerans</i> WP3, complete genome   | CP000472 |
| D5_357 | 136   | 21902  | 213  | 0 | 100 | 100 | 7565  | 9437  | Bacteriophage c2 complete genome                       | L48605   |
| D5_419 | 60    | 17840  | 440  | 0 | 96  | 96  | 7725  | 9494  | Bacteriophage 187, complete genome                     | AY954950 |
| D5_523 | 27    | 9222   | 149  | 0 | 97  | 97  | 587   | 173   | <i>Lactobacillus</i> phage PL-1, complete genome       | KC171647 |
| D5_622 | 18    | 9016   | 86   | 0 | 100 | 100 | 43    | 46    | <i>Pseudoplusia includens</i> SNPV IE, complete genome | KJ631622 |
| G1_1   | 16145 | 30652  | 0    |   |     |     |       |       | NA                                                     | NA       |
| G1_9   | 2586  | 19274  | 161  | 0 | 100 | 100 | 19271 | 34740 | <i>Bacillus</i> phage phi29, complete genome           | EU771092 |
| G1_12  | 1101  | 438    | 285  | 0 | 100 | 100 | 20711 | 31605 | <i>Leuconostoc</i> phage phiLN04, complete genome      | KC013023 |
| G1_19  | 1297  | 397    | 0    |   |     |     |       |       | NA                                                     | NA       |
| G1_21  | 2210  | 743    | 985  | 0 | 100 | 100 | 5015  | 7612  | <i>Strep. pneumoniae</i> AP200, complete genome        | CP002121 |
| G1_22  | 944   | 25715  | 4124 | 0 | 100 | 100 | 24041 | 43351 | <i>Enterobacteria</i> phage RB59, complete genome      | KM607003 |
| G1_31  | 879   | 455    | 1507 | 0 | 100 | 100 | 26462 | 47403 | <i>Enterobacteria</i> phage RB59, complete genome      | KM607003 |
| G1_52  | 753   | 437    | 443  | 0 | 100 | 100 | 3503  | 1606  | <i>Strep. pneumoniae</i> AP200, complete genome        | CP002121 |
| G1_115 | 686   | 549    | 0    |   |     |     |       |       | NA                                                     | NA       |
| G1_124 | 1072  | 508    | 0    |   |     |     |       |       | NA                                                     | NA       |
| G2_5   | 3839  | 19878  | 1222 | 0 | 100 | 100 | 15284 | 21456 | <i>Lactococcus</i> phage CB19, complete genome         | FJ848884 |
| G2_76  | 27    | 13116  | 247  | 0 | 100 | 100 | 3492  | 1558  | <i>Strep. pyogenes</i> M1 GAS, complete genome         | AE004092 |
| G2_90  | 29    | 20611  | 551  | 0 | 100 | 100 | 5191  | 3386  | <i>Strep. pneumoniae</i> AP200, complete genome        | CP002121 |
| G2_125 | 27    | 12988  | 245  | 0 | 100 | 100 | 1810  | 854   | <i>Strep. pneumoniae</i> AP200, complete genome        | CP002121 |
| G2_135 | 27    | 13598  | 262  | 0 | 100 | 100 | 5444  | 2297  | <i>Strep. pyogenes</i> MGAS6180, complete genome       | CP000056 |
| G2_155 | 26    | 14462  | 538  | 0 | 100 | 100 | 2848  | 1660  | <i>Strep. pyogenes</i> MGAS10270, complete genome      | CP000260 |
| G2_177 | 29    | 13046  | 305  | 0 | 100 | 100 | 2371  | 1276  | <i>Strep. pneumoniae</i> AP200, complete genome        | CP002121 |
| G2_200 | 29    | 18409  | 458  | 0 | 100 | 100 | 4808  | 2203  | <i>Strep. pneumoniae</i> AP200, complete genome        | CP002121 |
| G2_226 | 32    | 13086  | 260  | 0 | 100 | 100 | 2523  | 1705  | <i>Strep. pneumoniae</i> AP200, complete genome        | CP002121 |
| G2_235 | 25    | 12907  | 340  | 0 | 100 | 100 | 2336  | 1848  | <i>Strep. pneumoniae</i> AP200, complete genome        | CP002121 |
| G3_3   | 7894  | 21898  | 0    |   |     |     |       |       | NA                                                     | NA       |
| G3_18  | 206   | 25637  | 278  | 0 | 100 | 100 | 20711 | 31605 | <i>Leuconostoc</i> phage phiLN04, complete genome      | KC013023 |
| G3_19  | 17    | 12615  | 273  | 0 | 100 | 100 | 2260  | 977   | <i>Strep. pyogenes</i> MGAS6180, complete genome       | CP000056 |
| G3_79  | 18    | 27753  | 319  | 0 | 100 | 100 | 2976  | 1502  | <i>Strep. pyogenes</i> MGAS6180, complete genome       | CP000056 |
| G3_107 | 20    | 13452  | 238  | 0 | 100 | 100 | 2371  | 1276  | <i>Strep. pneumoniae</i> AP200, complete genome        | CP002121 |

|        |      |        |      |   |     |     |       |       |                                                         |          |
|--------|------|--------|------|---|-----|-----|-------|-------|---------------------------------------------------------|----------|
| G3_126 | 24   | 17128  | 0    |   |     |     |       |       | NA                                                      | NA       |
| G3_139 | 23   | 16000  | 0    |   |     |     |       |       | NA                                                      | NA       |
| G3_143 | 22   | 14787  | 444  | 0 | 100 | 100 | 2091  | 2295  | <i>Strep. pneumoniae</i> AP200, complete genome         | CP002121 |
| G3_160 | 20   | 13326  | 0    |   |     |     |       |       | NA                                                      | NA       |
| G3_210 | 23   | 16762  | 0    |   |     |     |       |       | NA                                                      | NA       |
| I2_1   | 1712 | 30122  | 1614 | 0 | 100 | 100 | 12707 | 21582 | <i>Lactococcus</i> phage jm2, complete genome           | KC182546 |
| I2_3   | 643  | 8132   | 590  | 0 | 100 | 100 | 8132  | 14275 | <i>Lactococcus</i> phage CaseusJM1, complete genome     | KC522412 |
| I2_5   | 224  | 5826   | 615  | 0 | 100 | 100 | 2779  | 4809  | <i>Lactococcus</i> phage CaseusJM1, complete genome     | KC522412 |
| I2_6   | 283  | 7790   | 688  | 0 | 100 | 100 | 3881  | 6975  | <i>Lactococcus</i> phage CaseusJM1, complete genome     | KC522412 |
| I2_7   | 132  | 19265  | 161  | 0 | 100 | 100 | 19262 | 34723 | <i>Bacillus</i> phage phi29, complete genome            | EU771092 |
| I2_10  | 40   | 8081   | 236  | 0 | 90  | 90  | 3951  | 5125  | Bacteriophage 187, complete genome                      | AY954950 |
| I2_18  | 7    | 5678   | 207  | 0 | 96  | 96  | 4670  | 5222  | Bacteriophage 187, complete genome                      | AY954950 |
| I2_22  | 9    | 4341   | 114  | 0 | 100 | 100 | 1452  | 2254  | Bacteriophage bIL285, complete genome                   | AF323668 |
| I2_25  | 7    | 4037   | 139  | 0 | 100 | 100 | 3144  | 4688  | Bacteriophage TP901-1, complete sequence                | AF304433 |
| I2_38  | 8    | 4563   | 123  | 0 | 100 | 100 | 4648  | 8068  | <i>Strep. thermophilus</i> phage 2972, complete genome  | AY699705 |
| I3_5   | 226  | 98658  | 1031 | 0 | 100 | 100 | 1815  | 1563  | <i>Strep. pneumoniae</i> AP200, complete genome         | CP002121 |
| I3_10  | 200  | 96714  | 1273 | 0 | 100 | 100 | 2823  | 1513  | <i>Strep. pyogenes</i> M1 GAS, complete genome          | AE004092 |
| I3_12  | 179  | 117729 | 1317 | 0 | 100 | 100 | 2493  | 1678  | <i>Strep. pneumoniae</i> AP200, complete genome         | CP002121 |
| I3_25  | 215  | 80678  | 1273 | 0 | 100 | 100 | 1994  | 863   | <i>Strep. pneumoniae</i> AP200, complete genome         | CP002121 |
| I3_26  | 178  | 140859 | 1559 | 0 | 100 | 100 | 1926  | 962   | <i>Strep. pyogenes</i> MGAS10270, complete genome       | CP000260 |
| I3_27  | 154  | 141287 | 1650 | 0 | 100 | 100 | 2403  | 1240  | <i>Strep. pyogenes</i> NZ131, complete genome           | CP000829 |
| I3_30  | 225  | 138640 | 1655 | 0 | 100 | 100 | 2786  | 1233  | <i>Strep. pneumoniae</i> AP200, complete genome         | CP002121 |
| I3_46  | 183  | 74592  | 656  | 0 | 100 | 100 | 1519  | 596   | <i>Strep. pyogenes</i> M1 GAS, complete genome          | AE004092 |
| I3_48  | 184  | 73022  | 1217 | 0 | 100 | 100 | 3970  | 2663  | <i>Strep. pyogenes</i> MGAS10270, complete genome       | CP000260 |
| I3_65  | 200  | 83179  | 1151 | 0 | 100 | 100 | 1597  | 1074  | <i>Strep. pneumoniae</i> AP200, complete genome         | CP002121 |
| I4_35  | 21   | 14746  | 423  | 0 | 100 | 100 | 2386  | 1480  | <i>Strep. pyogenes</i> MGAS10270, complete genome       | CP000260 |
| I4_88  | 16   | 13532  | 307  | 0 | 100 | 100 | 2394  | 798   | <i>Strep. pneumoniae</i> AP200, complete genome         | CP002121 |
| I4_101 | 23   | 12789  | 394  | 0 | 100 | 100 | 1726  | 2191  | Bacteriophage bIL311, complete genome                   | AF323672 |
| I4_133 | 12   | 13631  | 0    |   |     |     |       |       | NA                                                      | NA       |
| I4_145 | 17   | 22637  | 278  | 0 | 100 | 100 | 7509  | 11581 | Bacteriophage TP901-1, complete sequence                | AF304433 |
| I4_G3  | 18   | 12874  | 277  | 0 | 100 | 100 | 3382  | 1202  | <i>Strep. pneumoniae</i> AP200, complete genome         | CP002121 |
| I4_229 | 28   | 14408  | 423  | 0 | 100 | 100 | 2877  | 2443  | <i>Strep. pyogenes</i> M1 GAS, complete genome          | AE004092 |
| I4_267 | 15   | 13171  | 180  | 0 | 100 | 100 | 1298  | 490   | <i>Strep. pneumoniae</i> AP200, complete genome         | CP002121 |
| I4_311 | 21   | 12518  | 177  | 0 | 100 | 100 | 650   | 218   | <i>Lactobacillus</i> salivarius UCC118, complete genome | CP000233 |



|        |    |       |     |   |     |     |      |      |                                                         |          |
|--------|----|-------|-----|---|-----|-----|------|------|---------------------------------------------------------|----------|
| I4_788 | 14 | 13517 | 342 | 0 | 100 | 100 | 2162 | 959  | <i>Lactobacillus johnsonii</i> NCC 533, complete genome | AE017198 |
| I5_21  | 23 | 38367 | 379 | 0 | 100 | 100 | 1314 | 896  | <i>Strep. pneumoniae</i> AP200, complete genome         | CP002121 |
| I5_31  | 30 | 75448 | 813 | 0 | 100 | 100 | 2605 | 3031 | Bacteriophage bIL310, complete genome                   | AF323671 |
| I5_59  | 27 | 34685 | 576 | 0 | 100 | 100 | 1606 | 1049 | <i>Strep. pyogenes</i> M1 GAS, complete genome          | AE004092 |
| I5_89  | 29 | 35390 | 544 | 0 | 100 | 100 | 1717 | 786  | <i>Strep. pyogenes</i> MGAS10270, complete genome       | CP000260 |
| I5_90  | 28 | 32645 | 582 | 0 | 100 | 100 | 2386 | 1466 | <i>Strep. pyogenes</i> MGAS10270, complete genome       | CP000260 |
| I5_105 | 26 | 33213 | 451 | 0 | 100 | 100 | 1926 | 813  | <i>Strep. pneumoniae</i> AP200, complete genome         | CP002121 |
| I5_135 | 27 | 37176 | 724 | 0 | 100 | 100 | 3349 | 1864 | <i>Strep. pyogenes</i> MGAS2096, complete genome        | CP000261 |
| I5_182 | 29 | 51814 | 792 | 0 | 100 | 100 | 2653 | 1274 | <i>Strep. pneumoniae</i> AP200, complete genome         | CP002121 |
| I5_241 | 23 | 46659 | 572 | 0 | 100 | 100 | 1255 | 613  | <i>Strep. pyogenes</i> MGAS10750, complete genome       | CP000262 |
| I5_273 | 30 | 51672 | 909 | 0 | 100 | 100 | 1877 | 966  | <i>Strep. pneumoniae</i> AP200, complete genome         | CP002121 |

HSP: high-scoring segment pairs, D: Denmark, G: Germany, I: Ireland, NA: Not available

**Table S6.** BLAST comparison of contigs of the highest average read coverage (unclassified reads contigs)

| Contigs | Average coverage | Size  | Number of HSPs | Lowest E-value | Greatest identity % | Greatest positive % | Greatest HSP length | Greatest bit score | BLAST hit description                                           | Accession |
|---------|------------------|-------|----------------|----------------|---------------------|---------------------|---------------------|--------------------|-----------------------------------------------------------------|-----------|
| D2_4    | 529              | 4197  | 411            | 0              | 100                 | 100                 | 710                 | 274                | <i>Lactococcus</i> phage CaseusJM1, complete genome             | KC522412  |
| D2_13   | 1114             | 1762  | 177            | 0              | 100                 | 100                 | 181                 | 238                | <i>Lactococcus lactis</i> phage 645, complete genome            | KC182543  |
| D2_14   | 444              | 536   | 74             | 0              | 96                  | 96                  | 536                 | 701                | Bacteriophage phi-41 orfs L1-12, complete cds's, orf 13, 5' end | L35061    |
| D2_15   | 529              | 535   | 119            | 0              | 100                 | 100                 | 98                  | 129                | Bacteriophage bIL191 putative fiber protein gene, partial cds   | AY054977  |
| D2_16   | 227              | 609   | 122            | 0              | 96                  | 96                  | 609                 | 802                | Bacteriophage phi-41 orfs L1-12, complete cds's, orf 13, 5' end | L35061    |
| D2_20   | 284              | 214   | 47             | 0              | 97                  | 97                  | 189                 | 153                | <i>Lactococcus</i> phage 949, complete genome                   | HM029250  |
| D2_22   | 316              | 390   | 64             | 0              | 96                  | 96                  | 349                 | 176                | <i>Lactococcus</i> phage P335, complete genome                  | DQ838728  |
| D2_29   | 287              | 369   | 82             | 0              | 96                  | 96                  | 365                 | 283                | Bacteriophage Tuc2009, complete genome                          | AF109874  |
| D2_37   | 335              | 486   | 191            | 0              | 100                 | 100                 | 485                 | 726                | <i>Lactococcus</i> phage phi15, complete genome                 | KM091442  |
| D2_39   | 234              | 524   | 80             | 0              | 96                  | 96                  | 519                 | 676                | Bacteriophage phi-41 orfs L1-12, complete cds's, orf 13, 5' end | L35061    |
| D3_1    | 323              | 407   | 105            | 0              | 100                 | 100                 | 331                 | 295                | <i>Lactococcus</i> phage 949, complete genome                   | HM029250  |
| D3_3    | 129              | 325   | 105            | 0              | 100                 | 100                 | 57                  | 41                 | HIV-1 isolate BJOX010000.e34 from China                         | KM217737  |
| D3_4    | 2221             | 1580  | 94             | 0              | 100                 | 100                 | 102                 | 173                | <i>Lactococcus</i> phage P008, complete genome                  | DQ054536  |
| D3_5    | 149              | 653   | 229            | 0              | 100                 | 100                 | 253                 | 171                | <i>Lactococcus</i> phage P680, complete genome                  | KC182551  |
| D3_6    | 143              | 1471  | 148            | 0              | 100                 | 100                 | 135                 | 182                | <i>Lactococcus</i> phage phi15, complete genome                 | KM091442  |
| D3_7    | 135              | 547   | 174            | 0              | 100                 | 100                 | 473                 | 425                | Bacteriophage bIL309, complete genome                           | AF323670  |
| D3_9    | 241              | 560   | 159            | 0              | 100                 | 100                 | 531                 | 544                | Bacteriophage bIL15 putative fiber protein gene, partial cds    | AY054976  |
| D3_22   | 217              | 398   | 114            | 0              | 100                 | 100                 | 175                 | 281                | <i>Lactococcus</i> phage phi15, complete genome                 | KM091442  |
| D3_30   | 115              | 291   | 101            | 0              | 100                 | 100                 | 184                 | 142                | <i>Lactococcus</i> phage phi145, complete genome                | KM091444  |
| D3_31   | 111              | 247   | 176            | 0              | 100                 | 100                 | 128                 | 200                | <i>Bacteriophage</i> US3 lytic-enzyme (lytA) gene, complete cds | M90423    |
| D4_1    | 2660             | 1586  | 95             | 0              | 100                 | 100                 | 103                 | 174                | <i>Lactococcus</i> phage P008, complete genome                  | DQ054536  |
| D4_3    | 403              | 774   | 144            | 0              | 100                 | 100                 | 693                 | 881                | Bacteriophage phi-41 orfs L1-12, complete cds's, orf 13, 5' end | L35061    |
| D4_9    | 368              | 400   | 69             | 0              | 100                 | 100                 | 324                 | 292                | <i>Lactococcus</i> phage 949, complete genome                   | HM029250  |
| D4_10   | 169              | 1477  | 148            | 0              | 100                 | 100                 | 136                 | 183                | <i>Lactococcus</i> phage phi15, complete genome                 | KM091442  |
| D4_17   | 199              | 434   | 108            | 0              | 100                 | 100                 | 211                 | 320                | <i>Lactococcus</i> phage phi15, complete genome                 | KM091442  |
| D4_20   | 104              | 431   | 100            | 0              | 100                 | 100                 | 241                 | 295                | <i>Lactococcus</i> phage phi145, complete genome                | KM091444  |
| D4_32   | 107              | 547   | 149            | 0              | 100                 | 100                 | 473                 | 425                | Bacteriophage bIL309, complete genome                           | AF323670  |
| D4_36   | 132              | 603   | 129            | 0              | 98                  | 98                  | 111                 | 162                | <i>Bacteriophage</i> US3 lytic-enzyme (lytA) gene, complete cds | M90423    |
| D4_40   | 161              | 999   | 164            | 0              | 97                  | 97                  | 812                 | 1072               | <i>Lactococcus</i> phage phi145, complete genome                | KM091444  |
| D4_51   | 128              | 205   | 58             | 0              | 100                 | 100                 | 177                 | 207                | <i>Lactococcus</i> phage ASCC532, complete genome               | JQ740813  |
| D5_1    | 794              | 19272 | 161            | 0              | 100                 | 100                 | 19269               | 34736              | <i>Bacillus</i> phage phi29, complete genome                    | EU771092  |

|        |      |       |      |   |     |     |       |       |                                                                             |          |
|--------|------|-------|------|---|-----|-----|-------|-------|-----------------------------------------------------------------------------|----------|
| D5_3   | 468  | 1193  | 133  | 0 | 94  | 94  | 522   | 182   | <i>Lactococcus</i> phage ASCC454, complete genome                           | JQ740802 |
| D5_9   | 212  | 3481  | 319  | 0 | 100 | 100 | 737   | 277   | <i>Lactococcus</i> phage jm2, complete genome                               | KC182546 |
| D5_10  | 744  | 1502  | 198  | 0 | 100 | 100 | 146   | 192   | <i>Lactococcus</i> phage CaseusJM1, complete genome                         | KC522412 |
| D5_20  | 318  | 1649  | 154  | 0 | 100 | 100 | 124   | 178   | <i>Lactococcus</i> phage phi15, complete genome                             | KM091442 |
| D5_24  | 255  | 568   | 134  | 0 | 96  | 96  | 550   | 351   | <i>Lactococcus</i> phage fd13, complete genome                              | KC182545 |
| D5_53  | 226  | 227   | 63   | 0 | 100 | 100 | 257   | 205   | <i>Lactococcus</i> phage WRP3, complete genome                              | KM677185 |
| D5_55  | 276  | 608   | 125  | 0 | 96  | 96  | 606   | 806   | Bacteriophage phi-41 orfs L1-12, complete cds's, orf 13, 5' end             | L35061   |
| D5_56  | 193  | 536   | 108  | 0 | 100 | 100 | 536   | 701   | Bacteriophage phi-41 orfs L1-12, complete cds's, orf 13, 5' end             | L35061   |
| D5_75  | 178  | 507   | 110  | 0 | 100 | 100 | 506   | 688   | Bacteriophage phi-41 orfs L1-12, complete cds's, orf 13, 5' end             | L35061   |
| G1_8   | 2066 | 364   | 114  | 0 | 100 | 100 | 113   | 176   | <i>Lactococcus</i> phage CaseusJM1, complete genome                         | KC522412 |
| G1_9   | 152  | 9734  | 174  | 0 | 100 | 100 | 871   | 852   | <i>Streptococcus</i> phage TP-778L complete genome                          | HG380752 |
| G1_14  | 627  | 19273 | 161  | 0 | 100 | 100 | 19270 | 34738 | <i>Bacillus</i> phage phi29, complete genome                                | EU771092 |
| G1_26  | 122  | 5837  | 2349 | 0 | 100 | 100 | 5170  | 7862  | <i>Streptococcus pneumoniae</i> AP200, complete genome                      | CP002121 |
| G1_46  | 49   | 1198  | 36   | 0 | 100 | 100 | 444   | 360   | <i>Streptococcus pyogenes</i> MGAS315, complete genome                      | AE014074 |
| G1_78  | 1692 | 551   | 111  | 0 | 100 | 100 | 540   | 292   | <i>Lactococcus</i> phage P335, complete genome                              | DQ838728 |
| G1_239 | 94   | 352   | 72   | 0 | 100 | 100 | 288   | 396   | <i>Bacteriophage</i> US3 lytic-enzyme (lytA) gene, complete cds             | M90423   |
| G1_416 | 52   | 704   | 103  | 0 | 98  | 98  | 276   | 201   | <i>Lactococcus</i> bacteriophage Q65 putative <i>rbp</i> gene, complete cds | AY576320 |
| G1_455 | 60   | 915   | 57   | 0 | 100 | 100 | 64    | 55    | <i>Lactobacillus johnsonii</i> NCC 533, complete genome                     | AE017198 |
| G1_481 | 76   | 570   | 21   | 0 | 92  | 92  | 568   | 144   | <i>Streptococcus pneumoniae</i> AP200, complete genome                      | CP002121 |
| G2_36  | 227  | 2079  | 137  | 0 | 98  | 98  | 150   | 241   | Bacteriophage Tuc2009, complete genome                                      | AF109874 |
| G2_47  | 262  | 493   | 221  | 0 | 100 | 100 | 431   | 328   | <i>Lactococcus</i> phage jm3, complete genome                               | KC182547 |
| G2_74  | 836  | 314   | 100  | 0 | 98  | 98  | 43    | 70    | <i>Lactococcus</i> phage CB13, complete genome                              | FJ848882 |
| G2_111 | 288  | 232   | 74   | 0 | 100 | 100 | 47    | 72    | <i>Lactococcus</i> phage phi7, complete genome                              | KC182552 |
| G2_143 | 171  | 504   | 69   | 0 | 100 | 100 | 486   | 290   | <i>Lactococcus</i> phage SL4, complete genome                               | FJ848881 |
| G2_186 | 272  | 570   | 76   | 0 | 100 | 100 | 569   | 393   | <i>Lactococcus</i> phage phi7, complete genome                              | KC182552 |
| G2_217 | 154  | 377   | 83   | 0 | 100 | 100 | 182   | 153   | <i>Lactococcus lactis</i> phage p272, complete genome                       | KC182549 |
| G2_279 | 310  | 205   | 40   | 0 | 100 | 100 | 203   | 156   | <i>Lactococcus</i> phage phi145, complete genome                            | KM091444 |
| G2_295 | 156  | 273   | 98   | 0 | 95  | 95  | 87    | 106   | <i>Lactococcus lactis</i> phage P475, complete genome                       | KC182550 |
| G2_296 | 369  | 419   | 208  | 0 | 100 | 100 | 105   | 174   | <i>Lactococcus lactis</i> phage p272, complete genome                       | KC182549 |
| G3_6   | 83   | 910   | 295  | 0 | 95  | 95  | 400   | 274   | <i>Lactococcus</i> phage 936, complete genome                               | KC182544 |
| G3_34  | 87   | 5807  | 2388 | 0 | 100 | 100 | 4821  | 7397  | <i>Strep. pneumoniae</i> AP200, complete genome                             | CP002121 |
| G3_63  | 78   | 558   | 127  | 0 | 96  | 96  | 119   | 189   | <i>Lactococcus</i> bacteriophage Q66 putative <i>rbp</i> gene, complete cds | AY576319 |
| G3_116 | 159  | 469   | 126  | 0 | 100 | 100 | 184   | 164   | <i>Lactococcus</i> phage ASCC544, complete genome                           | JQ740814 |
| G3_130 | 454  | 592   | 189  | 0 | 100 | 100 | 389   | 589   | <i>Lactococcus</i> phage phi15, complete genome                             | KM091442 |

|        |      |       |      |   |     |     |       |       |                                                                      |          |
|--------|------|-------|------|---|-----|-----|-------|-------|----------------------------------------------------------------------|----------|
| G3_135 | 59   | 315   | 158  | 0 | 100 | 100 | 345   | 265   | <i>Lactococcus</i> phage fd13, complete genome                       | KC182545 |
| G3_191 | 320  | 275   | 96   | 0 | 100 | 100 | 275   | 234   | <i>Lactococcus</i> phage phi145, complete genome                     | KM091444 |
| G3_219 | 79   | 512   | 103  | 0 | 100 | 100 | 518   | 351   | <i>Lactococcus</i> phage ASCC532, complete genome                    | JQ740813 |
| G3_425 | 107  | 281   | 177  | 0 | 100 | 100 | 281   | 430   | <i>Lactococcus</i> phage P008, complete genome                       | DQ054536 |
| G3_471 | 60   | 628   | 269  | 0 | 100 | 100 | 574   | 230   | <i>Bacteriophage</i> US3 lytic-enzyme (lytA) gene, complete cds      | M90423   |
| I2_1   | 126  | 19430 | 162  | 0 | 100 | 100 | 19250 | 34702 | <i>Bacillus</i> phage phi29, complete genome                         | EU771092 |
| I2_3   | 50   | 1324  | 414  | 0 | 96  | 96  | 490   | 503   | <i>Lactococcus</i> phage phi15, complete genome                      | KM091442 |
| I2_9   | 37   | 8165  | 236  | 0 | 90  | 90  | 3951  | 5125  | Bacteriophage 187, complete genome                                   | AY954950 |
| I2_15  | 16   | 1640  | 125  | 0 | 100 | 100 | 1619  | 2201  | Bacteriophage 187, complete genome                                   | AY954950 |
| I2_16  | 28   | 375   | 235  | 0 | 100 | 100 | 116   | 137   | <i>Lactococcus lactis</i> bacteriophage sk1 sequences                | U01068   |
| I2_17  | 26   | 3789  | 141  | 0 | 100 | 100 | 1950  | 2586  | Bacteriophage 187, complete genome                                   | AY954950 |
| I2_22  | 11   | 2793  | 200  | 0 | 100 | 100 | 2156  | 3888  | <i>Enterobacteria</i> phage RB55, complete genome                    | KM607002 |
| I2_28  | 11   | 1701  | 134  | 0 | 100 | 100 | 1490  | 1702  | Bacteriophage 187, complete genome                                   | AY954950 |
| I2_30  | 9    | 772   | 178  | 0 | 100 | 100 | 772   | 1388  | <i>Enterobacteria</i> phage T4 isolate R4 and R8 gp37 and gp38 genes | KP162265 |
| I2_130 | 10   | 461   | 93   | 0 | 100 | 100 | 267   | 476   | <i>Enterobacteria</i> phage RB59, complete genome                    | KM607003 |
| I3_7   | 608  | 984   | 85   |   |     |     |       |       | NA                                                                   | NA       |
| I3_19  | 487  | 3598  | 125  | 0 | 100 | 100 | 81    | 52    | <i>Lactococcus</i> phage WRP3, complete genome                       | KM677185 |
| I3_23  | 390  | 1033  | 120  | 0 | 97  | 97  | 512   | 129   | <i>Staphylococcus aureus</i> 04-02981, complete genome               | CP001844 |
| I3_38  | 505  | 5473  | 1752 | 0 | 100 | 100 | 4703  | 5844  | <i>Streptococcus pneumoniae</i> AP200, complete genome               | CP002121 |
| I3_41  | 450  | 248   | 132  | 0 | 100 | 100 | 217   | 95    | <i>Streptococcus pyogenes</i> MGAS6180, complete genome              | CP000056 |
| I3_53  | 1456 | 751   | 0    |   |     |     |       |       | NA                                                                   | NA       |
| I3_57  | 1590 | 1313  | 176  | 0 | 100 | 100 | 476   | 425   | <i>Streptococcus pyogenes</i> MGAS315, complete genome               | AE014074 |
| I3_58  | 1322 | 1168  | 116  | 0 | 100 | 100 | 1081  | 304   | <i>Streptococcus pyogenes</i> NZ131, complete genome                 | CP000829 |
| I3_63  | 629  | 834   | 102  | 0 | 100 | 100 | 470   | 131   | <i>Staphylococcus epidermidis</i> RP62A, complete genome             | CP000029 |
| I3_90  | 972  | 459   | 0    |   |     |     |       |       | NA                                                                   | NA       |
| I4_2   | 1433 | 438   | 112  | 0 | 100 | 100 | 386   | 218   | Bacteriophage c2 complete genome                                     | L48605   |
| I4_5   | 149  | 499   | 0    |   |     |     |       |       | NA                                                                   | NA       |
| I4_8   | 4779 | 709   | 82   | 0 | 100 | 100 | 643   | 393   | <i>Lactococcus</i> phage bIL67 ORF35 gene, complete cds              | AY180212 |
| I4_14  | 54   | 234   | 0    |   |     |     |       |       | NA                                                                   | NA       |
| I4_16  | 67   | 419   | 0    |   |     |     |       |       | NA                                                                   | NA       |
| I4_37  | 109  | 5173  | 793  | 0 | 100 | 100 | 4889  | 5916  | <i>Streptococcus pneumoniae</i> AP200, complete genome               | CP002121 |
| I4_136 | 55   | 1245  | 116  | 0 | 100 | 100 | 1228  | 371   | <i>Streptococcus pyogenes</i> NZ131, complete genome                 | CP000829 |
| I4_177 | 52   | 2319  | 107  | 0 | 100 | 100 | 59    | 43    | <i>Mikumi yellow baboon virus 1</i> MYBV_M100 genome                 | KM110939 |
| I4_320 | 259  | 407   | 114  | 0 | 100 | 100 | 327   | 284   | Bacteriophage c2 complete genome                                     | L48605   |

|         |      |      |     |   |     |     |     |     |                                                         |          |
|---------|------|------|-----|---|-----|-----|-----|-----|---------------------------------------------------------|----------|
| I4_928  | 60   | 255  | 88  | 0 | 100 | 100 | 92  | 117 | <i>Lactococcus</i> phage bIL67, complete genome         | L33769   |
| I5_29   | 923  | 450  | 0   |   |     |     |     |     | NA                                                      | NA       |
| I5_61   | 791  | 384  | 139 | 0 | 100 | 100 | 267 | 384 | <i>Orf virus</i> strain D1701, complete genome          | HM133903 |
| I5_116  | 1078 | 705  | 81  | 0 | 100 | 100 | 643 | 393 | <i>Lactococcus</i> phage bIL67 ORF35 gene, complete cds | AY180212 |
| I5_127  | 842  | 680  | 0   |   |     |     |     |     | NA                                                      | NA       |
| I5_172  | 730  | 1814 | 0   |   |     |     |     |     | NA                                                      | NA       |
| I5_510  | 617  | 434  | 135 | 0 | 100 | 100 | 123 | 196 | <i>Lactococcus</i> phage bIL67, complete genome         | L33769   |
| I5_720  | 477  | 442  | 0   |   |     |     |     |     | NA                                                      | NA       |
| I5_2254 | 504  | 481  | 103 | 0 | 100 | 100 | 300 | 337 | <i>Orf virus</i> strain D1701, complete genome          | HM133903 |
| I5_3911 | 598  | 442  | 0   |   |     |     |     |     | NA                                                      | NA       |
| I5_4483 | 418  | 415  | 101 | 0 | 100 | 100 | 86  | 120 | <i>Jaagsiekte sheep retrovirus</i> , complete genome    | DQ838494 |

HSP: high-scoring segment pairs, D: Denmark, G: Germany, I: Ireland, NA: Not available

**Table S7.** BLAST comparison of contigs of the longest sizes (unclassified reads contigs)

| Contigs | Average coverage | Size  | Number of HSPs | Lowest E-value | Greatest identity % | Greatest positive % | Greatest HSP length | Greatest bit score | BLAST hit description                                               | Accession |
|---------|------------------|-------|----------------|----------------|---------------------|---------------------|---------------------|--------------------|---------------------------------------------------------------------|-----------|
| D2_3    | 18               | 27048 | 972            | 0              | 100                 | 100                 | 21930               | 38415              | <i>Lactobacillus</i> phage Ld25A, complete genome                   | KJ564036  |
| D2_4    | 529              | 4197  | 411            | 0              | 100                 | 100                 | 710                 | 274                | <i>Lactococcus</i> phage CaseusJM1, complete genome                 | KC522412  |
| D2_12   | 63               | 1573  | 63             | 0              | 100                 | 100                 | 102                 | 138                | <i>Lactococcus</i> phage P008, complete genome                      | DQ054536  |
| D2_13   | 1114             | 1762  | 177            | 0              | 100                 | 100                 | 181                 | 238                | <i>Lactococcus lactis</i> phage 645, complete genome                | KC182543  |
| D2_28   | 15               | 5437  | 149            | 0              | 100                 | 100                 | 4996                | 8735               | <i>Lactobacillus</i> phage Ld25A, complete genome                   | KJ564036  |
| D2_30   | 3                | 1634  | 102            | 0              | 100                 | 100                 | 1634                | 2858               | <i>Streptococcus</i> phage 5093, complete genome                    | FJ965538  |
| D2_49   | 4                | 2165  | 66             | 0              | 100                 | 100                 | 2165                | 3879               | <i>Streptococcus</i> phage 5093, complete genome                    | FJ965538  |
| D2_70   | 3                | 1431  | 205            | 0              | 100                 | 100                 | 105                 | 45                 | <i>Choristoneura rosaceana entomopoxvirus</i> 'L', complete genome  | HF679133  |
| D2_82   | 3                | 2149  | 87             | 0              | 100                 | 100                 | 2149                | 3859               | <i>Streptococcus</i> phage 5093, complete genome                    | FJ965538  |
| D2_83   | 5                | 1676  | 107            | 0              | 100                 | 100                 | 53                  | 70                 | Bacteriophage Tuc2009, complete genome                              | AF109874  |
| D3_4    | 2221             | 1580  | 94             | 0              | 100                 | 100                 | 102                 | 173                | <i>Lactococcus</i> phage P008, complete genome                      | DQ054536  |
| D3_11   | 39               | 9481  | 124            | 0              | 100                 | 100                 | 9484                | 17068              | <i>Bacillus</i> phage phi29, complete genome                        | EU771092  |
| D3_12   | 28               | 3868  | 123            | 0              | 100                 | 100                 | 3892                | 6977               | <i>Bacillus</i> phage phi29, complete genome                        | EU771092  |
| D3_15   | 29               | 5172  | 118            | 0              | 100                 | 100                 | 5187                | 9323               | <i>Bacillus</i> phage phi29, complete genome                        | EU771092  |
| D3_19   | 22               | 1661  | 124            | 0              | 100                 | 100                 | 1666                | 2997               | <i>Enterobacteria</i> phage RB59, complete genome                   | KM607003  |
| D3_67   | 12               | 1625  | 182            | 0              | 100                 | 100                 | 1625                | 2926               | <i>Enterobacteria</i> phage RB59, complete genome                   | KM607003  |
| D3_74   | 6                | 1737  | 262            | 0              | 100                 | 100                 | 1750                | 3134               | <i>Enterobacteria</i> phage RB59, complete genome                   | KM607003  |
| D3_92   | 6                | 1614  | 223            | 0              | 100                 | 100                 | 1614                | 2912               | <i>Enterobacteria</i> phage RB59, complete genome                   | KM607003  |
| D3_121  | 6                | 1615  | 802            | 0              | 100                 | 100                 | 1615                | 2908               | <i>Enterobacteria</i> phage RB59, complete genome                   | KM607003  |
| D3_129  | 6                | 1521  | 144            | 0              | 100                 | 100                 | 1521                | 2735               | <i>Enterobacteria</i> phage RB59, complete genome                   | KM607003  |
| D4_1    | 2660             | 1586  | 95             | 0              | 100                 | 100                 | 103                 | 174                | <i>Lactococcus</i> phage P008, complete genome                      | DQ054536  |
| D4_6    | 26               | 19151 | 162            | 0              | 100                 | 100                 | 19148               | 34521              | <i>Bacillus</i> phage phi29, complete genome                        | EU771092  |
| D4_12   | 4                | 1819  | 247            | 0              | 100                 | 100                 | 1839                | 3256               | <i>Enterobacteria</i> phage T4T, complete genome                    | HM137666  |
| D4_18   | 29               | 1641  | 113            | 0              | 100                 | 100                 | 95                  | 128                | Bacteriophage phi LC3, complete genome                              | AF242738  |
| D4_61   | 10               | 3193  | 258            | 0              | 100                 | 100                 | 2426                | 4369               | <i>Enterobacteria</i> phage RB55, complete genome                   | KM607002  |
| D4_63   | 4                | 1616  | 825            | 0              | 100                 | 100                 | 1625                | 2916               | <i>Enterobacteria</i> phage RB59, complete genome                   | KM607003  |
| D4_64   | 7                | 1764  | 500            | 0              | 100                 | 100                 | 1764                | 3182               | <i>Enterobacteria</i> phage RB59, complete genome                   | KM607003  |
| D4_106  | 6                | 1940  | 116            | 0              | 100                 | 100                 | 1940                | 3469               | <i>Enterobacteria</i> phage T4 isolate R4 or R8 gp37 and gp38 genes | KP162265  |
| D4_122  | 4                | 1569  | 167            | 0              | 100                 | 100                 | 1580                | 2831               | <i>Enterobacteria</i> phage RB59, complete genome                   | KM607003  |
| D4_130  | 5                | 1844  | 557            | 0              | 100                 | 100                 | 1900                | 3321               | <i>Enterobacteria</i> phage RB55, complete genome                   | KM607002  |
| D5_1    | 794              | 19272 | 161            | 0              | 100                 | 100                 | 19269               | 34736              | <i>Bacillus</i> phage phi29, complete genome                        | EU771092  |

|        |     |       |      |   |     |     |       |       |                                                             |          |
|--------|-----|-------|------|---|-----|-----|-------|-------|-------------------------------------------------------------|----------|
| D5_4   | 55  | 30429 | 2726 | 0 | 100 | 100 | 15288 | 27310 | <i>Enterobacteria</i> phage T4T, complete genome            | HM137666 |
| D5_6   | 40  | 66116 | 4766 | 0 | 100 | 100 | 49334 | 88498 | <i>Enterobacteria</i> phage RB59, complete genome           | KM607003 |
| D5_7   | 51  | 18169 | 689  | 0 | 100 | 100 | 18169 | 32741 | <i>Enterobacteria</i> phage RB59, complete genome           | KM607003 |
| D5_11  | 59  | 53589 | 2555 | 0 | 100 | 100 | 23327 | 41876 | <i>Enterobacteria</i> phage T4 strain wild, complete genome | KJ477684 |
| D5_25  | 12  | 10017 | 123  | 0 | 100 | 100 | 68    | 48    | <i>Rhodococcus</i> phage REQ3, complete genome              | JN116824 |
| D5_33  | 9   | 5112  | 0    |   |     |     |       |       | NA                                                          | NA       |
| D5_35  | 31  | 5518  | 156  | 0 | 100 | 100 | 5274  | 6544  | Bacteriophage 187, complete genome                          | AY954950 |
| D5_50  | 12  | 5200  | 111  | 0 | 100 | 100 | 71    | 46    | <i>Mycobacterium</i> phage Squirty, complete genome         | KM101124 |
| D5_103 | 13  | 5899  | 114  | 0 | 100 | 100 | 87    | 52    | <i>Mycobacterium</i> phage Dori, complete genome            | JN698995 |
| G1_3   | 12  | 6517  | 199  | 0 | 100 | 100 | 3503  | 1606  | <i>Streptococcus pneumoniae</i> AP200, complete genome      | CP002121 |
| G1_9   | 152 | 9734  | 174  | 0 | 100 | 100 | 871   | 852   | <i>Streptococcus</i> phage TP-778L complete genome          | HG380752 |
| G1_14  | 627 | 19273 | 161  | 0 | 100 | 100 | 19270 | 34738 | <i>Bacillus</i> phage phi29, complete genome                | EU771092 |
| G1_17  | 16  | 6278  | 173  | 0 | 100 | 100 | 1334  | 239   | <i>Streptococcus pneumoniae</i> AP200, complete genome      | CP002121 |
| G1_18  | 13  | 6567  | 686  | 0 | 100 | 100 | 3881  | 6921  | <i>Enterobacteria</i> phage RB59, complete genome           | KM607003 |
| G1_21  | 22  | 7611  | 533  | 0 | 100 | 100 | 6080  | 10886 | <i>Enterobacteria</i> phage RB59, complete genome           | KM607003 |
| G1_23  | 21  | 6030  | 477  | 0 | 100 | 100 | 6032  | 10876 | <i>Enterobacteria</i> phage RB59, complete genome           | KM607003 |
| G1_70  | 22  | 6376  | 199  | 0 | 100 | 100 | 6249  | 7233  | <i>Streptococcus pyogenes</i> MGAS6180, complete genome     | CP000056 |
| G1_99  | 16  | 9750  | 46   | 0 | 100 | 100 | 1945  | 524   | <i>Streptococcus pyogenes</i> MGAS10270, complete genome    | CP000260 |
| G1_206 | 14  | 6050  | 197  | 0 | 100 | 100 | 3470  | 2504  | <i>Streptococcus pneumoniae</i> AP200, complete genome      | CP002121 |
| G2_8   | 81  | 5076  | 826  | 0 | 100 | 100 | 5015  | 7608  | <i>Streptococcus pneumoniae</i> AP200, complete genome      | CP002121 |
| G2_21  | 12  | 4123  | 100  | 0 | 100 | 100 | 1396  | 728   | <i>Streptococcus pneumoniae</i> AP200, complete genome      | CP002121 |
| G2_80  | 10  | 4927  | 388  | 0 | 100 | 100 | 2702  | 1550  | <i>Streptococcus pyogenes</i> MGAS10270, complete genome    | CP000260 |
| G2_124 | 17  | 6082  | 198  | 0 | 100 | 100 | 6089  | 7126  | <i>Streptococcus pyogenes</i> M1 GAS, complete genome       | AE004092 |
| G2_232 | 12  | 4297  | 147  | 0 | 100 | 100 | 1688  | 1347  | <i>Streptococcus pyogenes</i> MGAS10750, complete genome    | CP000262 |
| G2_415 | 19  | 4859  | 174  | 0 | 93  | 93  | 3046  | 2746  | <i>Streptococcus pneumoniae</i> AP200, complete genome      | CP002121 |
| G2_447 | 11  | 3977  | 167  | 0 | 100 | 100 | 3470  | 2459  | <i>Streptococcus pneumoniae</i> AP200, complete genome      | CP002121 |
| G2_471 | 10  | 4306  | 139  | 0 | 100 | 100 | 1810  | 854   | <i>Streptococcus pneumoniae</i> AP200, complete genome      | CP002121 |
| G2_483 | 9   | 4748  | 280  | 0 | 100 | 100 | 2243  | 795   | <i>Streptococcus pneumoniae</i> AP200, complete genome      | CP002121 |
| G2_484 | 14  | 4313  | 97   | 0 | 100 | 100 | 2282  | 472   | <i>Streptococcus pyogenes</i> MGAS2096, complete genome     | CP000261 |
| G3_1   | 14  | 9246  | 190  | 0 | 100 | 100 | 1905  | 1384  | <i>Streptococcus pyogenes</i> MGAS6180, complete genome     | CP000056 |
| G3_41  | 17  | 11109 | 216  | 0 | 100 | 100 | 4507  | 4284  | <i>Streptococcus pneumoniae</i> AP200, complete genome      | CP002121 |
| G3_53  | 11  | 7813  | 191  | 0 | 97  | 97  | 2091  | 1491  | <i>Streptococcus pyogenes</i> MGAS10270, complete genome    | CP000260 |
| G3_74  | 18  | 7620  | 187  | 0 | 100 | 100 | 7296  | 8488  | <i>Streptococcus pyogenes</i> M1 GAS, complete genome       | AE004092 |
| G3_83  | 12  | 6777  | 121  | 0 | 100 | 100 | 1334  | 239   | <i>Streptococcus pneumoniae</i> AP200, complete genome      | CP002121 |

|        |     |        |      |   |     |     |       |       |                                                                       |          |
|--------|-----|--------|------|---|-----|-----|-------|-------|-----------------------------------------------------------------------|----------|
| G3_114 | 8   | 18448  | 458  | 0 | 100 | 100 | 2260  | 977   | <i>Streptococcus pyogenes</i> MGAS6180, complete genome               | CP000056 |
| G3_127 | 13  | 13131  | 77   | 0 | 100 | 100 | 1945  | 524   | <i>Streptococcus pyogenes</i> MGAS10270, complete genome              | CP000260 |
| G3_143 | 8   | 7236   | 158  | 0 | 100 | 100 | 1073  | 573   | <i>Streptococcus pyogenes</i> MGAS2096, complete genome               | CP000261 |
| G3_232 | 12  | 8632   | 226  | 0 | 100 | 100 | 2690  | 3458  | <i>Streptococcus pneumoniae</i> AP200, complete genome                | CP002121 |
| G3_234 | 13  | 6912   | 159  | 0 | 100 | 100 | 5191  | 3384  | <i>Streptococcus pneumoniae</i> AP200, complete genome                | CP002121 |
| I2_1   | 126 | 19430  | 162  | 0 | 100 | 100 | 19250 | 34702 | <i>Bacillus</i> phage phi29, complete genome                          | EU771092 |
| I2_5   | 9   | 3846   | 108  | 0 | 100 | 100 | 3926  | 6775  | <i>Streptococcus</i> phage 858, complete genome                       | EF529515 |
| I2_7   | 6   | 1949   | 91   | 0 | 100 | 100 | 1766  | 2773  | <i>Streptococcus</i> phage Abc2, complete genome                      | FJ236310 |
| I2_9   | 37  | 8165   | 236  | 0 | 90  | 90  | 3951  | 5125  | Bacteriophage 187, complete genome                                    | AY954950 |
| I2_13  | 5   | 3399   | 138  | 0 | 100 | 100 | 3392  | 5047  | <i>Streptococcus thermophilus</i> bacteriophage 2972, complete genome | AY699705 |
| I2_17  | 26  | 3789   | 141  | 0 | 100 | 100 | 1950  | 2586  | Bacteriophage 187, complete genome                                    | AY954950 |
| I2_20  | 6   | 2246   | 107  | 0 | 96  | 96  | 2242  | 2185  | Bacteriophage 187, complete genome                                    | AY954950 |
| I2_22  | 11  | 2793   | 200  | 0 | 100 | 100 | 2156  | 3888  | <i>Enterobacteria</i> phage RB55, complete genome                     | KM607002 |
| I2_24  | 5   | 2000   | 124  | 0 | 100 | 100 | 1098  | 643   | <i>Staphylococcus</i> phage vB_SepiS-phiIPLA7, complete genome        | JN192401 |
| I2_42  | 6   | 2501   | 149  | 0 | 96  | 96  | 2400  | 3058  | Bacteriophage 187, complete genome                                    | AY954950 |
| I3_3   | 70  | 137688 | 1649 | 0 | 100 | 100 | 2786  | 1233  | <i>Streptococcus pneumoniae</i> AP200, complete genome                | CP002121 |
| I3_4   | 55  | 117628 | 1317 | 0 | 100 | 100 | 2493  | 1678  | <i>Streptococcus pneumoniae</i> AP200, complete genome                | CP002121 |
| I3_14  | 67  | 80420  | 1253 | 0 | 100 | 100 | 1994  | 863   | <i>Streptococcus pneumoniae</i> AP200, complete genome                | CP002121 |
| I3_15  | 48  | 79278  | 1240 | 0 | 100 | 100 | 2403  | 1240  | <i>Streptococcus pyogenes</i> NZ131, complete genome                  | CP000829 |
| I3_18  | 63  | 88786  | 1197 | 0 | 100 | 100 | 2823  | 1513  | <i>Streptococcus pyogenes</i> M1 GAS, complete genome                 | AE004092 |
| I3_31  | 61  | 141086 | 1857 | 0 | 100 | 100 | 1678  | 1074  | <i>Streptococcus pneumoniae</i> AP200, complete genome                | CP002121 |
| I3_35  | 51  | 77196  | 970  | 0 | 100 | 100 | 1630  | 631   | <i>Streptococcus pyogenes</i> MGAS10750, complete genome              | CP000262 |
| I3_49  | 68  | 112858 | 1328 | 0 | 100 | 100 | 5202  | 4250  | <i>Streptococcus pyogenes</i> MGAS5005, complete genome               | CP000017 |
| I3_87  | 58  | 73756  | 1042 | 0 | 100 | 100 | 1810  | 878   | <i>Lactobacillus johnsonii</i> NCC 533, complete genome               | AE017198 |
| I3_129 | 48  | 73702  | 655  | 0 | 100 | 100 | 1519  | 596   | <i>Streptococcus pyogenes</i> M1 GAS, complete genome                 | AE004092 |
| I4_6   | 23  | 8376   | 122  | 0 | 100 | 100 | 380   | 146   | <i>Staphylococcus aureus</i> 04-02981, complete genome                | CP001844 |
| I4_26  | 15  | 6288   | 215  | 0 | 100 | 100 | 2667  | 2448  | <i>Streptococcus pyogenes</i> M1 GAS, complete genome                 | AE004092 |
| I4_37  | 109 | 5173   | 789  | 0 | 100 | 100 | 4889  | 5916  | <i>Streptococcus pneumoniae</i> AP200, complete genome                | CP002121 |
| I4_217 | 24  | 5107   | 80   | 0 | 100 | 100 | 1656  | 306   | <i>Lactobacillus johnsonii</i> NCC 533, complete genome               | AE017198 |
| I4_256 | 25  | 7709   | 182  | 0 | 100 | 100 | 6576  | 3873  | <i>Streptococcus pyogenes</i> MGAS2096, complete genome               | CP000261 |
| I4_303 | 7   | 4593   | 132  | 0 | 100 | 100 | 556   | 275   | <i>Streptococcus pyogenes</i> NZ131, complete genome                  | CP000829 |
| I4_305 | 7   | 5455   | 241  | 0 | 100 | 100 | 1325  | 378   | <i>Streptococcus pyogenes</i> NZ131, complete genome                  | CP000829 |
| I4_319 | 8   | 4479   | 200  | 0 | 100 | 100 | 1033  | 371   | <i>Streptococcus pyogenes</i> NZ131, complete genome                  | CP000829 |
| I4_514 | 10  | 4713   | 292  | 0 | 100 | 100 | 1586  | 1058  | <i>Streptococcus pyogenes</i> M1 GAS, complete genome                 | AE004092 |



| 14_584 | 8  | 5251  | 0   |   |     |     |      |      | NA                                                       | NA       |
|--------|----|-------|-----|---|-----|-----|------|------|----------------------------------------------------------|----------|
| 15_89  | 21 | 23390 | 459 | 0 | 100 | 100 | 2386 | 1466 | <i>Streptococcus pyogenes</i> MGAS10270, complete genome | CP000260 |
| 15_100 | 19 | 29403 | 453 | 0 | 100 | 100 | 2135 | 1045 | <i>Lactobacillus salivarius</i> UCC118, complete genome  | CP000233 |
| 15_104 | 29 | 22849 | 586 | 0 | 100 | 100 | 1916 | 553  | <i>Streptococcus pneumoniae</i> AP200, complete genome   | CP002121 |
| 15_125 | 23 | 31339 | 343 | 0 | 100 | 100 | 2093 | 797  | <i>Streptococcus pneumoniae</i> AP200, complete genome   | CP002121 |
| 15_217 | 23 | 22185 | 356 | 0 | 100 | 100 | 1508 | 999  | <i>Streptococcus pyogenes</i> NZ131, complete genome     | CP000829 |
| 15_311 | 20 | 22484 | 389 | 0 | 100 | 100 | 2338 | 609  | <i>Streptococcus pneumoniae</i> AP200, complete genome   | CP002121 |
| 15_330 | 20 | 35138 | 531 | 0 | 100 | 100 | 1970 | 800  | <i>Lactobacillus salivarius</i> UCC118, complete genome  | CP000233 |
| 15_372 | 22 | 23787 | 480 | 0 | 100 | 100 | 1803 | 1249 | <i>Streptococcus pyogenes</i> NZ131, complete genome     | CP000829 |
| 15_375 | 27 | 29703 | 553 | 0 | 100 | 100 | 5202 | 4216 | <i>Streptococcus pyogenes</i> MGAS5005, complete genome  | CP000017 |
| 15_640 | 18 | 21933 | 447 | 0 | 100 | 100 | 1451 | 573  | <i>Streptococcus pyogenes</i> MGAS315, complete genome   | AE014074 |

HSP: high-scoring segment pairs, D: Denmark, G: Germany, I: Ireland, NA: Not available

**Table S8.** Diversity of 936 phages in whey mixture metavirome sequences. Reads per kilobase per million mapped reads (RPKM) values were derived from the number of reads that showed a minimum of 95% identity over 95% of the query length upon Ublast against 936 phages RBP sequences. Obtained numbers were normalized by the size of the subject RBP sequence, followed by the size of the metavirome.

| RBP variant | RPKM values |      |      |      |       |      |       |       |    |    |    |
|-------------|-------------|------|------|------|-------|------|-------|-------|----|----|----|
|             | D2          | D3   | D4   | D5   | G1    | G2   | G3    | I2    | I3 | I4 | I5 |
| ASCC473     | 251         | 347  | 412  | 123  | 49    | 658  | 202   | 4     | 0  | 0  | 0  |
| HD16        | 101         | 454  | 436  | 43   | 17    | 28   | 122   | 0     | 0  | 0  | 0  |
| PhiB1127    | 168         | 60   | 73   | 40   | 48    | 64   | 352   | 4     | 0  | 0  | 0  |
| P113G       | 146         | 189  | 76   | 95   | 4     | 58   | 79    | 349   | 1  | 0  | 0  |
| ASCC406     | 1639        | 1050 | 814  | 1489 | 8     | 32   | 2456  | 3565  | 0  | 1  | 0  |
| 936         | 146         | 47   | 31   | 87   | 120   | 28   | 4     | 198   | 0  | 0  | 0  |
| Phi4        | 245         | 6    | 1    | 127  | 118   | 7209 | 388   | 15    | 0  | 0  | 0  |
| PhiA16      | 69          | 0    | 0    | 0    | 24    | 1428 | 71    | 4     | 0  | 0  | 0  |
| Q66         | 397         | 0    | 0    | 217  | 30    | 247  | 146   | 10    | 0  | 0  | 0  |
| 1727        | 898         | 792  | 5215 | 1478 | 49    | 4499 | 2019  | 34    | 0  | 8  | 1  |
| phage 7     | 9130        | 5004 | 3732 | 9070 | 40    | 1271 | 15616 | 14718 | 3  | 4  | 2  |
| fd13        | 1061        | 565  | 460  | 445  | 2     | 6    | 426   | 4083  | 0  | 1  | 0  |
| HD6         | 333         | 13   | 3    | 137  | 0     | 25   | 1     | 230   | 0  | 0  | 0  |
| Q49         | 392         | 417  | 267  | 178  | 0     | 2    | 36    | 0     | 0  | 0  | 0  |
| Phi42       | 1154        | 19   | 3    | 1218 | 0     | 22   | 285   | 0     | 0  | 0  | 0  |
| PhiL6       | 6474        | 23   | 10   | 3274 | 4     | 8    | 5     | 0     | 0  | 3  | 1  |
| Phi17       | 0           | 0    | 0    | 0    | 0     | 0    | 0     | 0     | 0  | 0  | 0  |
| SCH         | 5594        | 4069 | 4293 | 2867 | 13307 | 2051 | 0     | 0     | 0  | 3  | 2  |
| 645         | 1383        | 8258 | 6478 | 279  | 10    | 0    | 1012  | 0     | 2  | 1  | 2  |

D: Denmark, G: Germany, I: Ireland

Table S9

Diversity of *Leuconostoc* phages in whey mixture metavirome sequences. Reads per kilobase per million mapped (RPKM) values were derived from the number of reads that showed a minimum of 95% identity over 95% of the query length upon Ublast against *Leuconostoc* phages RBP sequences. Obtained numbers were normalized by the size of the subject RBP sequence, followed by the size of the metavirome.

| RBP variant | RPKM values |    |    |     |     |    |     |    |    |    |    |
|-------------|-------------|----|----|-----|-----|----|-----|----|----|----|----|
|             | D2          | D3 | D4 | D5  | G1  | G2 | G3  | I2 | I3 | I4 | I5 |
| LNTR2       | 0           | 0  | 0  | 2   | 0   | 0  | 0   | 0  | 0  | 0  | 0  |
| LN32        | 0           | 0  | 0  | 0   | 0   | 0  | 0   | 0  | 0  | 0  | 0  |
| LN25        | 0           | 0  | 0  | 0   | 0   | 0  | 0   | 0  | 0  | 0  | 0  |
| LN-9        | 0           | 0  | 0  | 0   | 0   | 0  | 0   | 0  | 0  | 0  | 0  |
| LN6B        | 1           | 2  | 0  | 185 | 875 | 0  | 265 | 0  | 0  | 0  | 0  |
| P793        | 0           | 0  | 0  | 0   | 65  | 0  | 22  | 0  | 0  | 0  | 0  |
| LN23        | 0           | 0  | 0  | 0   | 0   | 0  | 3   | 0  | 0  | 0  | 0  |

D: Denmark, G: Germany, I: Ireland
